# Supplementary material for: The Independent Effects of Procurement Biopsy Findings on 10-Year Outcomes of Extended Criteria Donor Kidney Transplants
Source: PubMed Central journal article supplement — Kidney Int Rep. 2022 May 30;7(8):1850–65. doi: 10.1016/j.ekir.2022.05.027 (PMC9366372; doi:10.1016/j.ekir.2022.05.027), 2022-05-30
Supplement: mmc1.pdf [file mmc1.pdf]

|                                                                                                |                                                                                                                                                                                                                                             |
|------------------------------------------------------------------------------------------------|---------------------------------------------------------------------------------------------------------------------------------------------------------------------------------------------------------------------------------------------|
| <b>Record ID</b>                                                                               | <input type="text"/>                                                                                                                                                                                                                        |
| <b>OPTN Donor Id</b><br><small>* must provide value</small>                                    | <input type="text"/> <input type="button" value="v"/><br><small>Type initial letters to filter Donor ID dropdown</small>                                                                                                                    |
| <b>Confirm OPTN Donor Id</b><br><small>* must provide value</small>                            | <input type="text"/>                                                                                                                                                                                                                        |
| <b>Kidney Laterality</b><br><small>* must provide value</small>                                | <input type="button" value="v"/>                                                                                                                                                                                                            |
| <b>Biopsy Information</b>                                                                      |                                                                                                                                                                                                                                             |
| <b>Was a Biopsy Report found among the attachments?</b><br><small>* must provide value</small> | <input type="radio"/> Yes<br><input type="radio"/> No<br><br><input type="radio"/> Needle / Core<br><input type="radio"/> Wedge<br><input type="radio"/> Other<br><input type="radio"/> Unknown<br><br><input type="button" value="reset"/> |
| <b>Type of Biopsy Sample:</b><br><small>* must provide value</small>                           | <input type="text"/><br><br><input type="button" value="reset"/>                                                                                                                                                                            |
| <b>Other Biopsy Sample Type:</b><br><small>* must provide value</small>                        | <input type="text"/><br><br><input type="button" value="Expand"/>                                                                                                                                                                           |
| <b>Biopsy Preparation Method:</b><br><small>* must provide value</small>                       | <input type="radio"/> Frozen section<br><input type="radio"/> Fixed/permanent (paraffin-embedded)<br><input type="radio"/> Other<br><input type="radio"/> Unknown<br><br><input type="button" value="reset"/>                               |
| <b>Other Biopsy Sample Preparation Method:</b><br><small>* must provide value</small>          | <input type="text"/><br><br><input type="button" value="Expand"/>                                                                                                                                                                           |
| <b>Number of Glomeruli Observed:</b>                                                           | <input type="text"/>                                                                                                                                                                                                                        |
| <b>Number of Glomeruli Sclerosed:</b>                                                          | <input type="text"/>                                                                                                                                                                                                                        |
| <b>% Glomerulosclerosis (Calculated Field):</b>                                                | <input type="text"/> <input type="button" value="View equation"/>                                                                                                                                                                           |
| <b>% Glomerulosclerosis (Direct Entry of Percentage)</b>                                       | <input type="text"/>                                                                                                                                                                                                                        |

**Interstitial Fibrosis\*:**

(\* Note: absent and minimal will be grouped together for analysis, so the distinction is not critical.)

\* must provide value

- Absent/none (0%)
- Minimal (1-5%)
- Mild (6-25%)
- Mild-moderate (26-50%)
- Severe (>50% of cortex involved)
- Other
- Unknown

reset

**You entered "Other" for Interstitial Fibrosis. Please describe.**

\* must provide value

Expand

**Arterial intimal fibrosis (aka, arteriosclerosis or chronic vascular changes or vascular damage or vascular narrowing):\***

(\* Note: absent and minimal will be grouped together for analysis, so the distinction is not important.)

\* must provide value

- Absent/none (0%)
- Minimal (0%)
- Mild (1-25%)
- Mild-moderate (26-50%)
- Severe (>50% vascular narrowing)
- Other
- Unknown

reset

**You entered "Other" for Arterial intimal fibrosis (aka, arteriosclerosis or chronic vascular changes or vascular damage or vascular narrowing):. Please describe.**

\* must provide value

Expand

**Arteriolar hyalinosis (strictly involves arterioles, the vessels without internal elastic lamina):\***

(\* Note: absent and minimal will be grouped together for analysis, so the distinction is not important.)

\* must provide value

- Absent/none
- Minimal
- Mild (at least one arteriole)
- Mild-moderate (more than one arteriole)
- Severe (multiple arterioles affected, circumferential)
- Other
- Unknown

reset

**You entered "Other" for Arteriolar hyalinosis (strictly involves arterioles, the vessels without internal elastic lamina). Please describe.**

\* must provide value

Expand

**Tubular atrophy\*:**

(\* Note: absent and minimal will be grouped together for analysis, so the distinction is not critical.)

\* must provide value

- Absent/none (0%)
- Minimal (0%)
- Mild (1-25%)
- Mild-moderate (26-50%)
- Severe (>50% of cortical tubules involved)
- Other
- Unknown

reset

**You entered "Other" for Tubular Atrophy. Please describe.**

\* must provide value

Expand

**Interstitial inflammation\*:**

(\* Note: absent and minimal will be grouped together for analysis, so the distinction is not critical.)

\* must provide value

- Absent/none (0%)
- Minimal (1-10%)
- Mild (10-25%)
- Mild-moderate (26-50%)
- Severe (>50% of cortex involved)
- Other
- Unknown

reset

**You entered "Other" for interstitial inflammation. Please describe.**

\* must provide value

Expand

**Acute Tubular Injury (ATI) / Necrosis (ATN):\***

(\* Note: absent and minimal will be grouped together for analysis, so the distinction is not important.)

\* must provide value

- Absent
- Minimal
- Mild (epithelial flattening, tubule dilation, nuclear dropout, loss of brush border)
- Mild-moderate (focal coagulative type necrosis)
- Severe (infarction)
- Other
- Unknown

reset

**You entered "Other" for Acute Tubular Injury (ATI) / Necrosis (ATN). Please describe.**

\* must provide value

Expand

**Biopsy Comments**

Expand

**Was another Biopsy Report found among the attachments?**

\* must provide value

- Yes
- No

reset

**Biopsy 2 Information**

**Type of Biopsy Sample:**

\* must provide value

- Needle / Core
- Wedge
- Other
- Unknown

reset

**Other Biopsy Sample Type:**

\* must provide value

Expand

**Biopsy Preparation Method:**

\* must provide value

- Frozen section
- Fixed/permanent (paraffin-embedded)
- Other
- Unknown

reset

**Other Biopsy Sample Preparation Method:**

\* must provide value

Expand

Number of Glomeruli Observed:

Number of Glomeruli Sclerosed:

% Glomerulosclerosis (Calculated Field):

[View equation](#)

% Glomerulosclerosis (Direct Entry of Percentage)

Interstitial Fibrosis\*:

(\* Note: absent and minimal will be grouped together for analysis, so the distinction is not critical.)

\* must provide value

- Absent/none (0%)
- Minimal (1-5%)
- Mild (6-25%)
- Mild-moderate (26-50%)
- Severe (>50% of cortex involved)
- Other
- Unknown

[reset](#)

You entered "Other" for Interstitial Fibrosis. Please describe.

\* must provide value

[Expand](#)

Arterial intimal fibrosis (aka, arteriosclerosis or chronic vascular changes or vascular damage or vascular narrowing):\*

(\* Note: absent and minimal will be grouped together for analysis, so the distinction is not important.)

\* must provide value

- Absent/none (0%)
- Minimal (0%)
- Mild (1-25%)
- Mild-moderate (26-50%)
- Severe (>50% vascular narrowing)
- Other
- Unknown

[reset](#)

You entered "Other" for Arterial intimal fibrosis (aka, arteriosclerosis or chronic vascular changes or vascular damage or vascular narrowing):. Please describe.

\* must provide value

[Expand](#)

Arteriolar hyalinosis (strictly involves arterioles, the vessels without internal elastic lamina):\*

(\* Note: absent and minimal will be grouped together for analysis, so the distinction is not important.)

\* must provide value

- Absent/none
- Minimal
- Mild (at least one arteriole)
- Mild-moderate (more than one arteriole)
- Severe (multiple arterioles affected, circumferential)
- Other
- Unknown

[reset](#)

You entered "Other" for Arteriolar hyalinosis (strictly involves arterioles, the vessels without internal elastic lamina). Please describe.

\* must provide value

[Expand](#)

Tubular atrophy\*:

(\* Note: absent and minimal will be grouped together for analysis, so the distinction is not critical.)

\* must provide value

- Absent/none (0%)
- Minimal (0%)
- Mild (1-25%)
- Mild-moderate (26-50%)
- Severe (>50% of cortical tubules involved)
- Other
- Unknown

[reset](#)

**You entered "Other" for Tubular Atrophy. Please describe.**

\* must provide value

Expand

**Interstitial inflammation\*:**

**(\* Note: absent and minimal will be grouped together for analysis, so the distinction is not critical.)**

\* must provide value

- Absent/none (0%)
- Minimal (1-10%)
- Mild (10-25%)
- Mild-moderate (26-50%)
- Severe (>50% of cortex involved)
- Other
- Unknown

reset

**You entered "Other" for interstitial inflammation. Please describe.**

\* must provide value

Expand

**Acute Tubular Injury (ATI) / Necrosis (ATN):\***

**(\* Note: absent and minimal will be grouped together for analysis, so the distinction is not important.)**

\* must provide value

- Absent
- Minimal
- Mild (epithelial flattening, tubule dilation, nuclear dropout, loss of brush border)
- Mild-moderate (focal coagulative type necrosis)
- Severe (infarction)
- Other
- Unknown

reset

**You entered "Other" for Acute Tubular Injury (ATI) / Necrosis (ATN). Please describe.**

\* must provide value

Expand

**Biopsy Comments**

Expand

**Was another Biopsy Report found among the attachments?**

\* must provide value

- Yes
- No

reset

**Biopsy 3 Information**

**Type of Biopsy Sample:**

\* must provide value

- Needle / Core
- Wedge
- Other
- Unknown

reset

**Other Biopsy Sample Type:**

\* must provide value

Expand

**Biopsy Preparation Method:**

\* must provide value

- Frozen section
- Fixed/permanent (paraffin-embedded)
- Other
- Unknown

reset

**Other Biopsy Sample Preparation Method:**

\* must provide value

Expand

**Number of Glomeruli Observed:**

**Number of Glomeruli Sclerosed:**

**% Glomerulosclerosis (Calculated Field):**

View equation

**% Glomerulosclerosis (Direct Entry of Percentage)**

**Interstitial Fibrosis\*:**

(\* Note: absent and minimal will be grouped together for analysis, so the distinction is not critical.)

\* must provide value

- Absent/none (0%)
- Minimal (1-5%)
- Mild (6-25%)
- Mild-moderate (26-50%)
- Severe (>50% of cortex involved)
- Other
- Unknown

reset

**You entered "Other" for Interstitial Fibrosis. Please describe.**

\* must provide value

Expand

**Arterial intimal fibrosis (aka, arteriosclerosis or chronic vascular changes or vascular damage or vascular narrowing):\***

(\* Note: absent and minimal will be grouped together for analysis, so the distinction is not important.)

\* must provide value

- Absent/none (0%)
- Minimal (0%)
- Mild (1-25%)
- Mild-moderate (26-50%)
- Severe (>50% vascular narrowing)
- Other
- Unknown

reset

**You entered "Other" for Arterial intimal fibrosis (aka, arteriosclerosis or chronic vascular changes or vascular damage or vascular narrowing):. Please describe.**

\* must provide value

Expand

**Arteriolar hyalinosis (strictly involves arterioles, the vessels without internal elastic lamina):\***

(\* Note: absent and minimal will be grouped together for analysis, so the distinction is not important.)

\* must provide value

- Absent/none
- Minimal
- Mild (at least one arteriole)
- Mild-moderate (more than one arteriole)
- Severe (multiple arterioles affected, circumferential)
- Other
- Unknown

reset

**You entered "Other" for Arteriolar hyalinosis (strictly involves arterioles, the vessels without internal elastic lamina). Please describe.**

\* must provide value

Expand

**Tubular atrophy\*:**

(\* Note: absent and minimal will be grouped together for analysis, so the distinction is not critical.)

\* must provide value

- Absent/none (0%)
- Minimal (0%)
- Mild (1-25%)
- Mild-moderate (26-50%)
- Severe (>50% of cortical tubules involved)
- Other
- Unknown

reset

Expand

**You entered "Other" for Tubular Atrophy. Please describe.**

\* must provide value

**Interstitial inflammation\*:**

(\* Note: absent and minimal will be grouped together for analysis, so the distinction is not critical.)

\* must provide value

- Absent/none (0%)
- Minimal (1-10%)
- Mild (10-25%)
- Mild-moderate (26-50%)
- Severe (>50% of cortex involved)
- Other
- Unknown

reset

Expand

**You entered "Other" for interstitial inflammation. Please describe.**

\* must provide value

**Acute Tubular Injury (ATI) / Necrosis (ATN):\***

(\* Note: absent and minimal will be grouped together for analysis, so the distinction is not important.)

\* must provide value

- Absent
- Minimal
- Mild (epithelial flattening, tubule dilation, nuclear dropout, loss of brush border)
- Mild-moderate (focal coagulative type necrosis)
- Severe (infarction)
- Other
- Unknown

reset

Expand

**You entered "Other" for Acute Tubular Injury (ATI) / Necrosis (ATN). Please describe.**

\* must provide value

**Biopsy Comments**

Expand

**Anatomy Information**

**Was an Anatomy Report found among the attachments?**

\* must provide value

- Yes
- No

reset

**Kidney Length (cm)**

**Kidney Width (cm)**

**Surgical Damage:**

\* must provide value

- Yes
- No
- Other
- Unknown

reset

**You entered "[Surgical\_Damage]" for Surgical Damage. Please describe.**

\* must provide value

Expand

**Anatomical Abnormalities:**

\* must provide value

- Yes
- No
- Other
- Unknown

reset

**You entered "[Anatomical\_Abnormalities]" for Anatomical Abnormalities. Please describe.**

\* must provide value

Expand

**Number of Arteries:**

\* must provide value

**Number of Veins:**

\* must provide value

- Single
- Double
- Other
- Unknown

reset

**Ureter:**

\* must provide value

**Ureter 1 Length (cm):**

\* must provide value

**Ureter 2 Length (cm):**

\* must provide value

**You entered "[Ureter]" for Ureter. Please describe.**

\* must provide value

Expand

**Aortic Plaque:**

\* must provide value

- Yes
- No
- Other
- Unknown

reset

**Aortic Plaque Type:**

\* must provide value

- Soft
- Hard
- Unknown

**Aortic Plaque Severity**

\* must provide value

- Mild
- Moderate
- Severe
- Unknown

reset

**You entered "[Aortic\_Plaque]" for Aortic Plaque. Please describe.**

\* must provide value

Expand



**Arterial Plaque**

\* must provide value

- Yes
- No
- Other
- Unknown

reset

**Arterial Plaque Type**

\* must provide value

- Soft
- Hard
- Unknown

**Arterial Plaque Severity**

\* must provide value

- Mild
- Moderate
- Severe
- Unknown

reset

**You entered "[Arterial\_Plaque]" for Arterial Plaque. Please describe.**

\* must provide value

Expand

**Infarcted Areas**

\* must provide value

- Yes
- No
- Other
- Unknown

reset

**Number of Infarcted Areas**

\* must provide value

**You entered "[Infarcted\_Areas]" for Infarcted Areas. Please describe.**

\* must provide value

Expand

**Capsular Tears**

\* must provide value

- Yes
- No
- Other
- Unknown

reset

**You entered "Other" for Capsular Tears. Please describe.**

\* must provide value

Expand

**Subcapsular Hematomas**

\* must provide value

- Yes
- No
- Other
- Unknown

reset

**You entered "Other" for Subcapsular Hematomas. Please describe.**

\* must provide value

Expand

**Cysts/Discoloration**

\* must provide value

- Yes
- No
- Other
- Unknown

reset

**Number of Cysts**

\* must provide value

**Mean Cyst Size (cm<sup>3</sup>)**

**You entered "Other" for Cysts/Discoloration. Please describe.**

\* must provide value

Expand

**Fat Removed**

\* must provide value

- Yes
- No
- Other
- Unknown

reset

**You entered "Other" for Fat Removed. Please describe.**

\* must provide value

Expand

**Anatomy Comments**

Expand

Figure S-2. Bootstrapped Doubly Robust Regression Process Flow

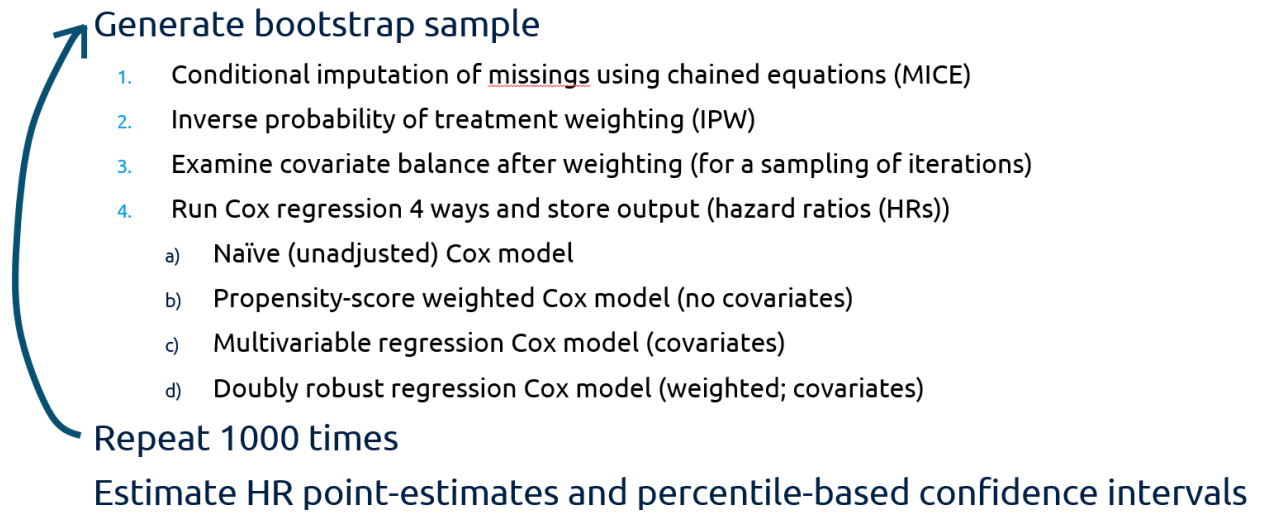

Figure S-3. Nominal vs. Empirical Bayes (“Shrinkage”) Estimates of Glomerulosclerosis, by Number of Glomeruli Observed

**A** Comparison of Shrinkage vs. Nominal Percent Sclerosed:

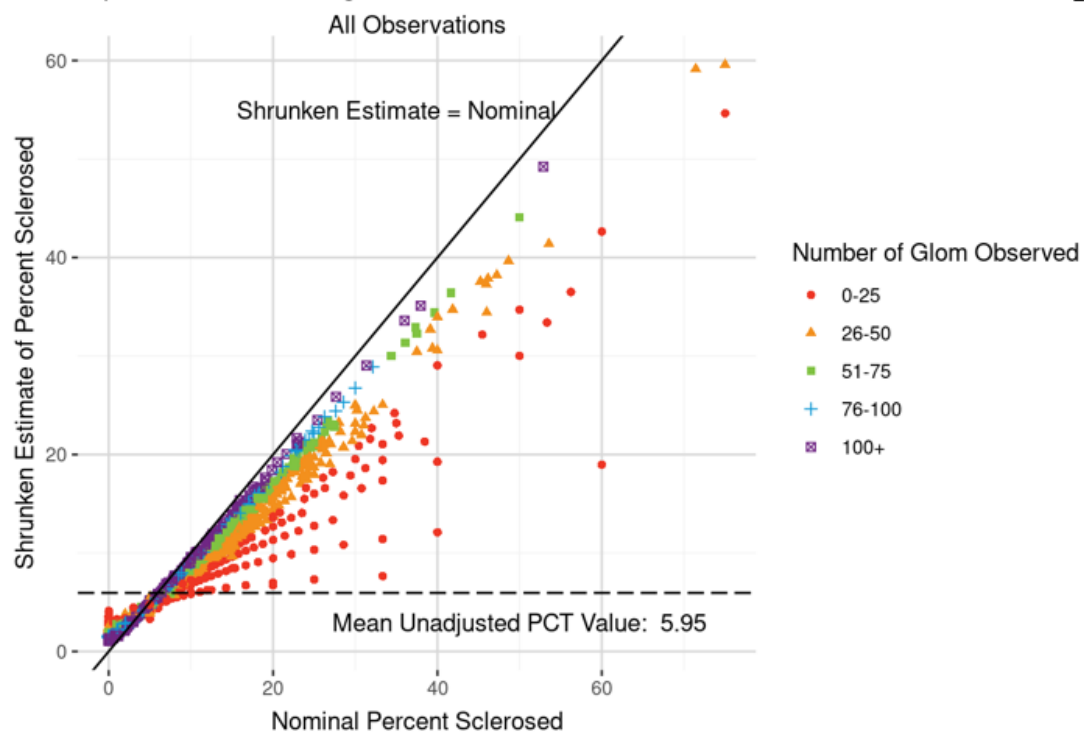

**B** Comparison of Shrinkage vs. Nominal Percent Sclerosed:

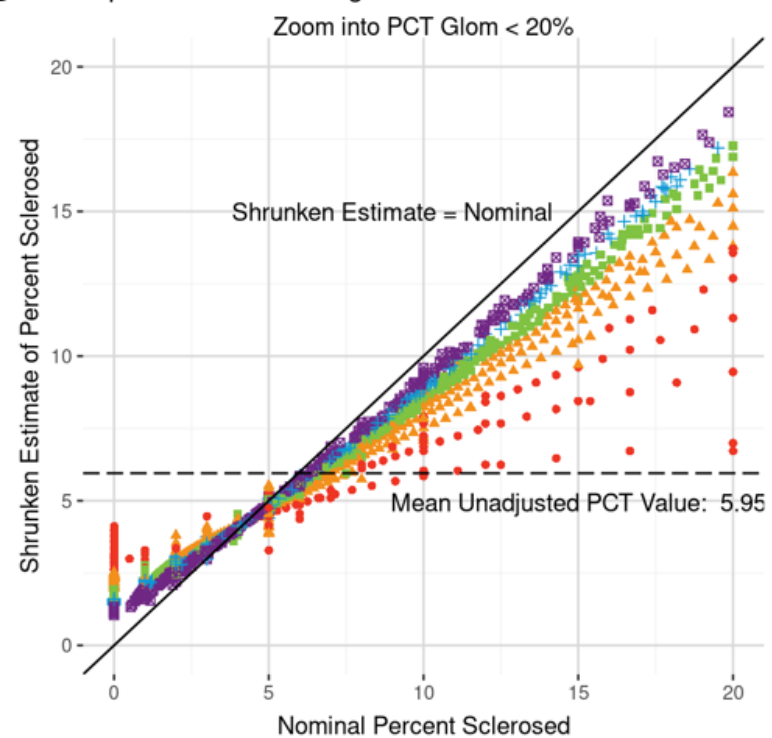

Figure S-4. Ten-Year Kaplan-Meier Death-Censored Graft Survival by 3-Level Glomerulosclerosis

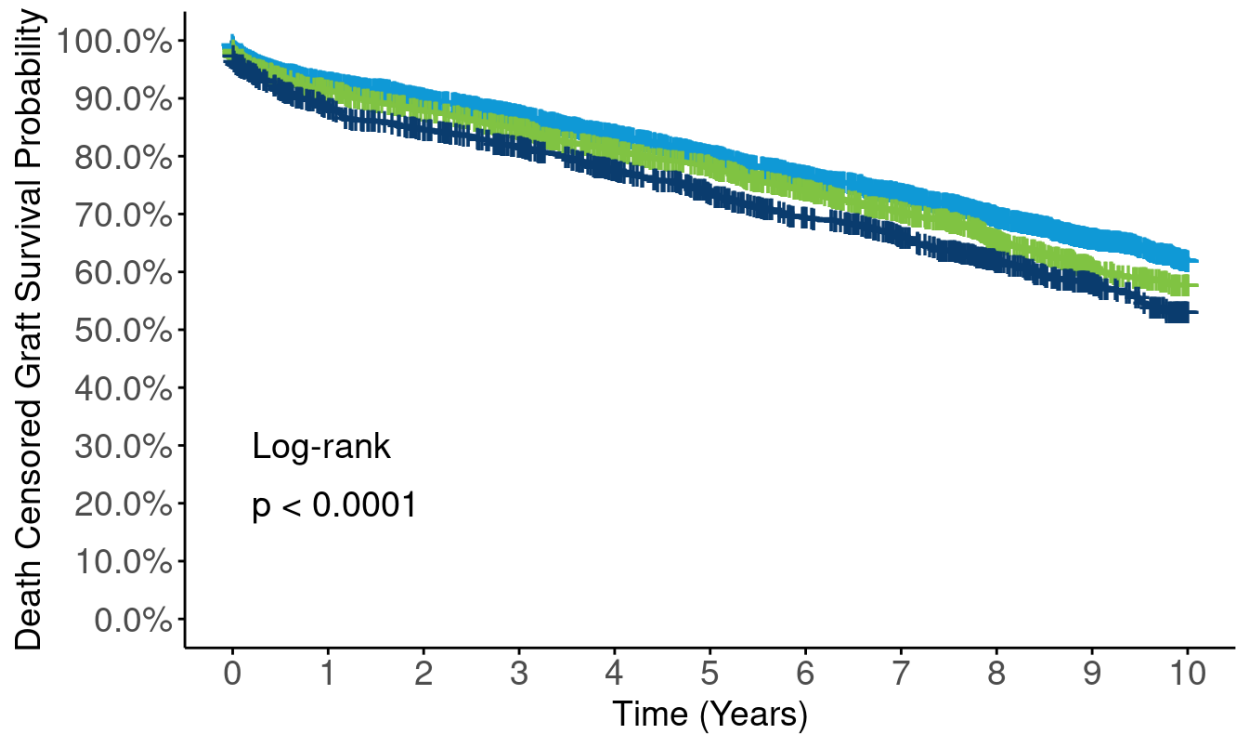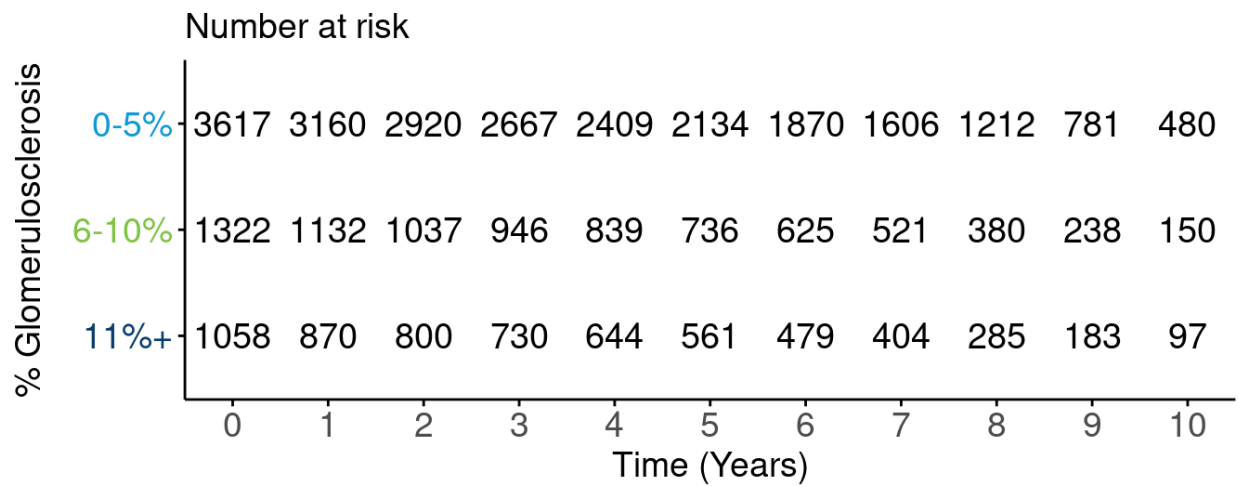

Figure S-5. Ten-Year Kaplan-Meier All-Cause Graft Survival by 5-Level Glomerulosclerosis

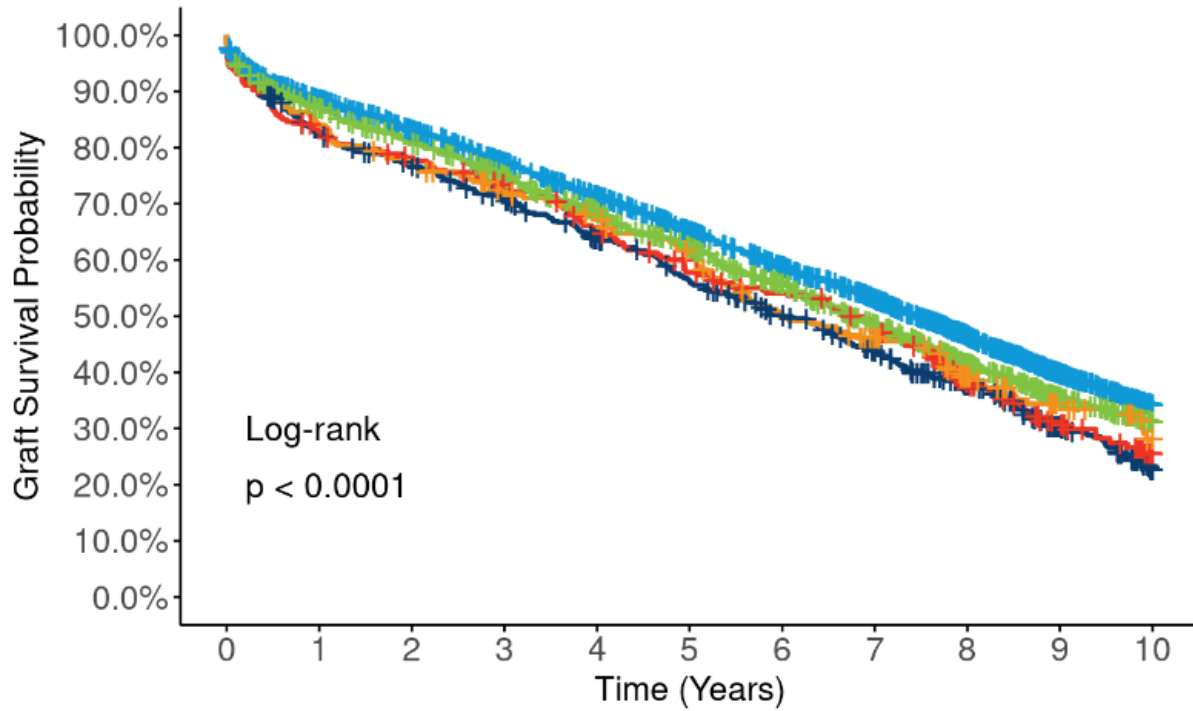

| Number at risk       |              | 0    | 1    | 2    | 3    | 4    | 5    | 6    | 7    | 8    | 9   | 10  |
|----------------------|--------------|------|------|------|------|------|------|------|------|------|-----|-----|
| % Glomerulosclerosis | 0-5%         | 3617 | 3160 | 2920 | 2667 | 2409 | 2134 | 1870 | 1606 | 1212 | 781 | 480 |
|                      | 6-10%        | 1322 | 1132 | 1037 | 946  | 839  | 736  | 625  | 521  | 380  | 238 | 150 |
|                      | 11-15%       | 592  | 483  | 445  | 406  | 355  | 309  | 264  | 218  | 159  | 102 | 54  |
|                      | 16-20%       | 247  | 203  | 187  | 173  | 151  | 129  | 117  | 101  | 65   | 42  | 19  |
|                      | 21%+         | 219  | 184  | 168  | 151  | 138  | 123  | 98   | 85   | 61   | 39  | 24  |
|                      | Time (Years) | 0    | 1    | 2    | 3    | 4    | 5    | 6    | 7    | 8    | 9   | 10  |

Figure S-6. Correlation between Kidney Donor Profile Index (KDPI) and Kidney Glomerulosclerosis

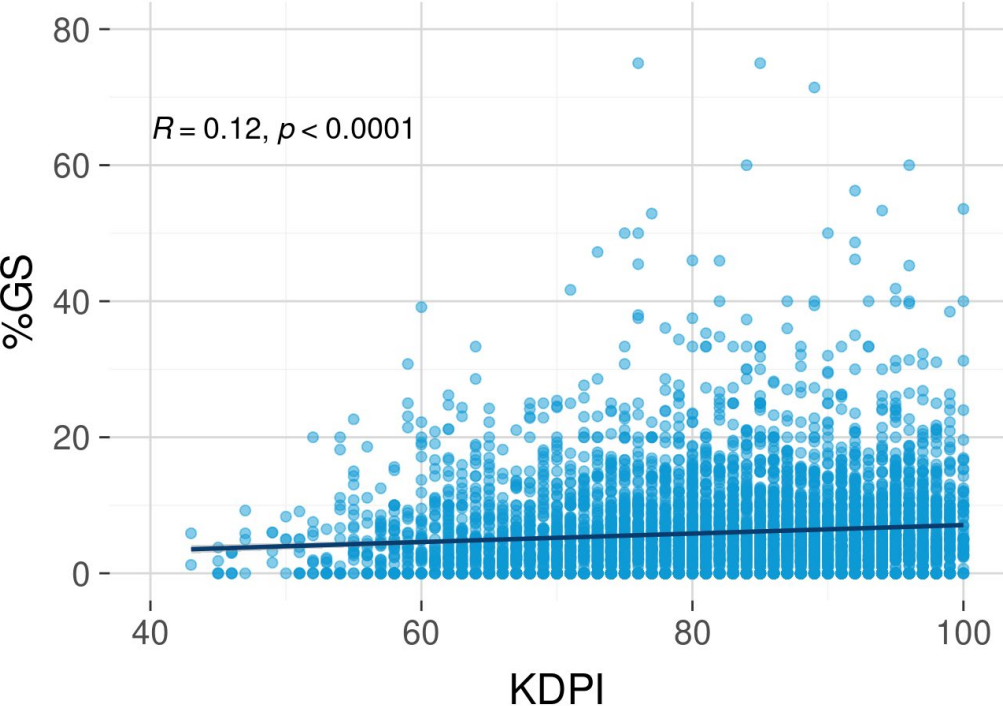

Figure S-7. Unadjusted and Adjusted Associations between Five-Level Glomerulosclerosis and 10-Year All-Cause Graft Failure Risk

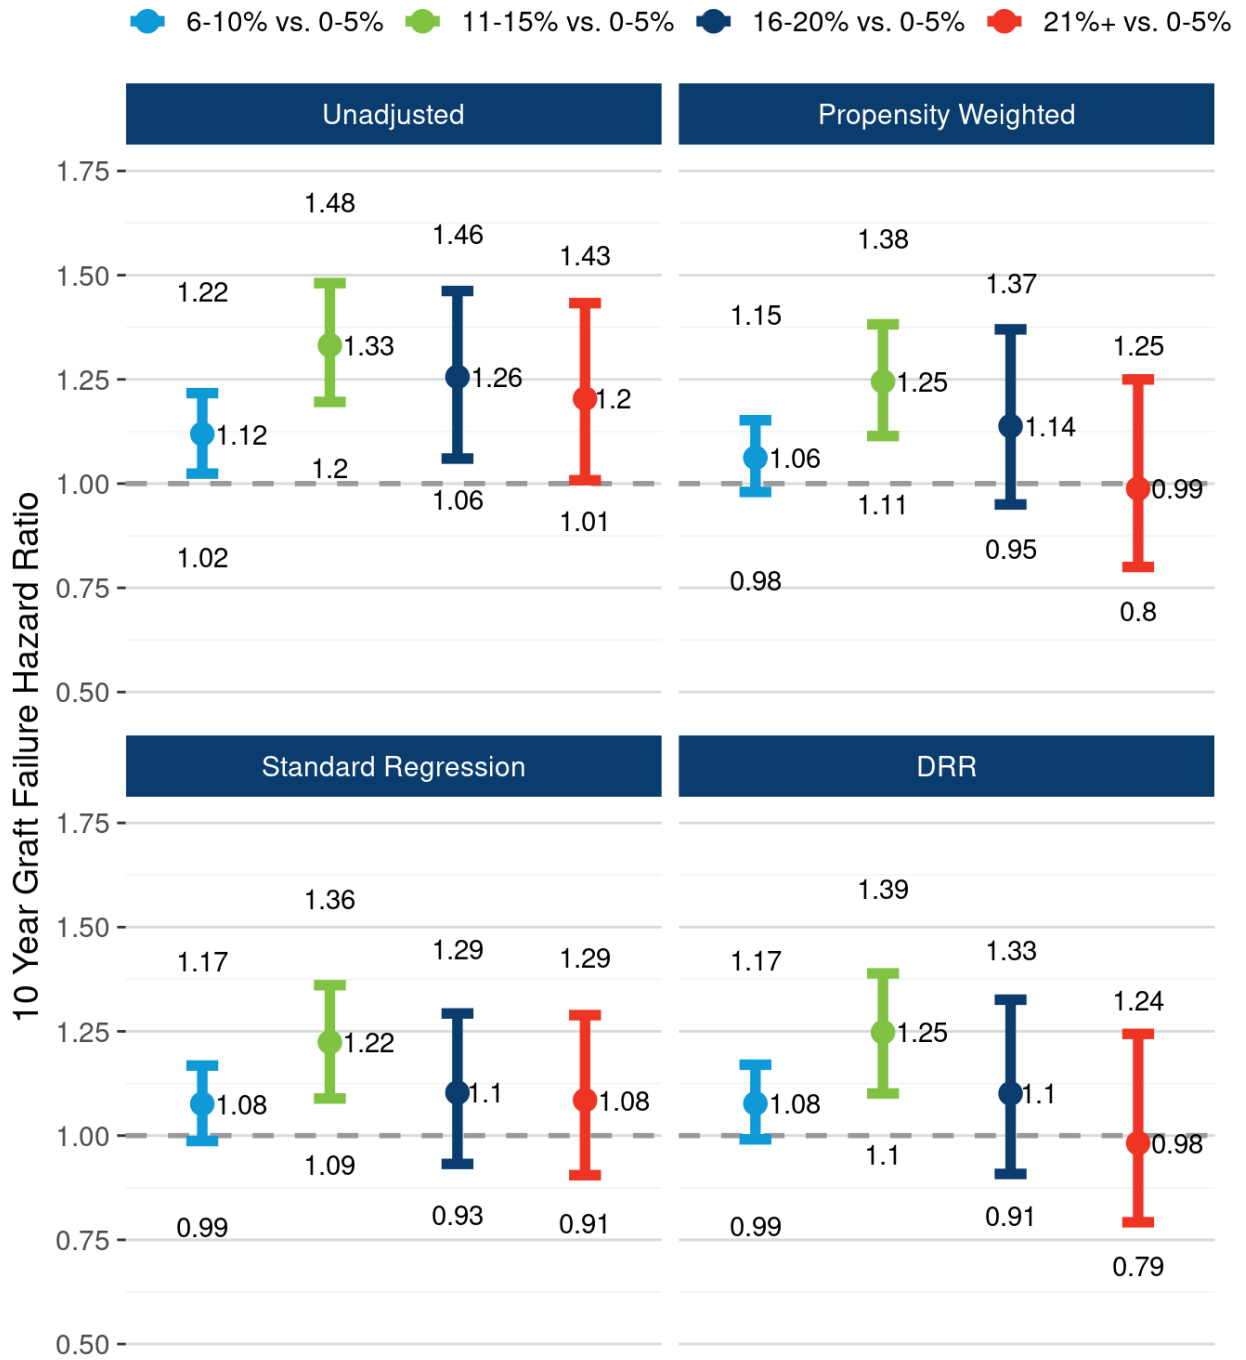



Figure S-8. Unadjusted and Adjusted Associations between Ten-Year **All-Cause** Graft Failure Risk and Empirical Bayes (“Shrunken”) Estimate of Glomerulosclerosis, Modeled as a **Restricted-Cubic Spline** **Nonlinear Function**

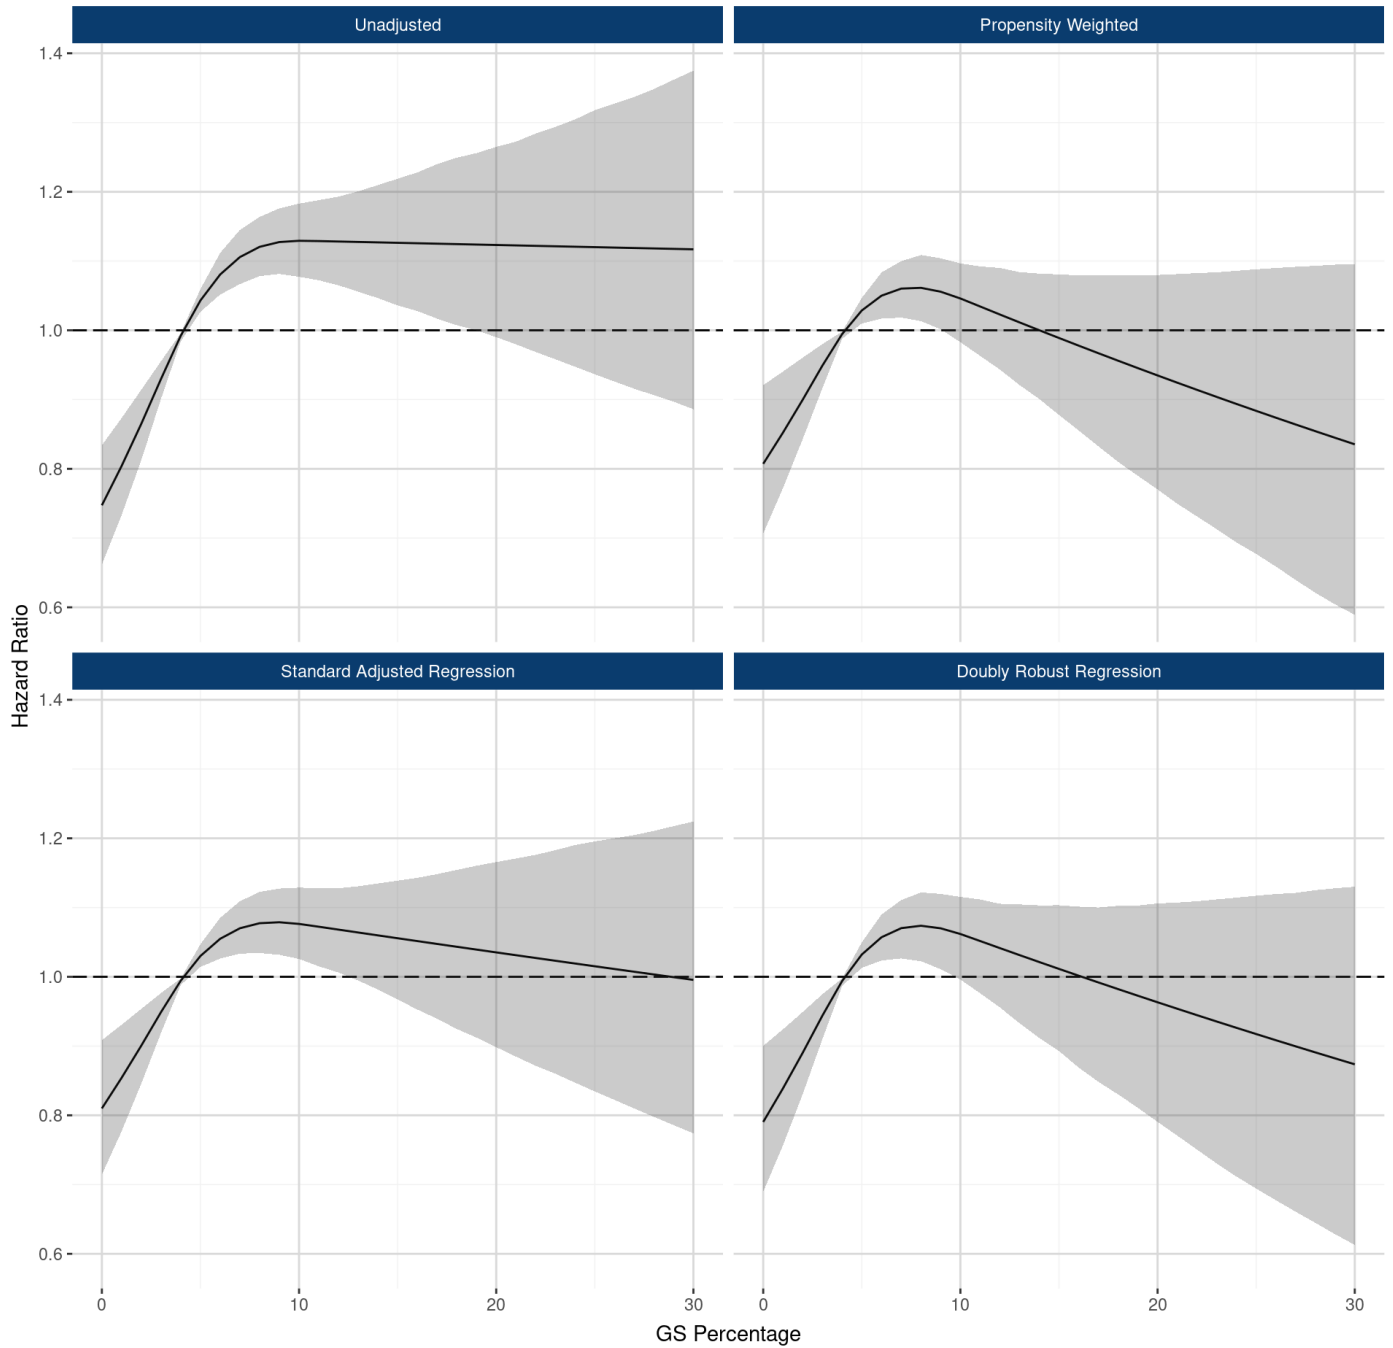

Figure S-9. Ten-Year Kaplan-Meier Death-Censored Graft Survival by Interstitial Fibrosis

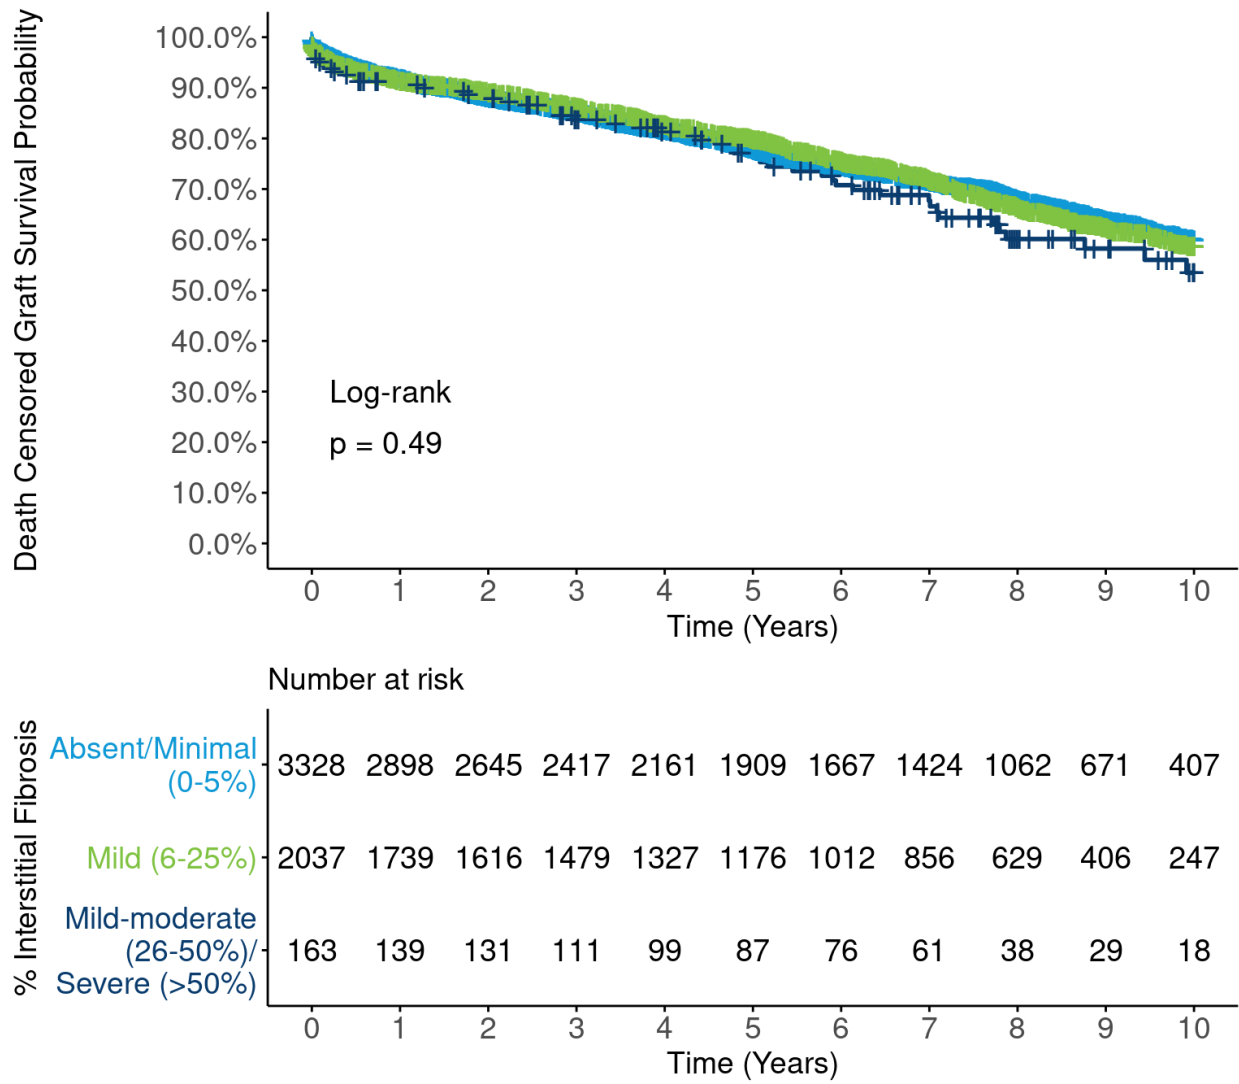

Figure S-10. Ten-Year Kaplan-Meier Death-Censored Graft Survival by Vascular Changes

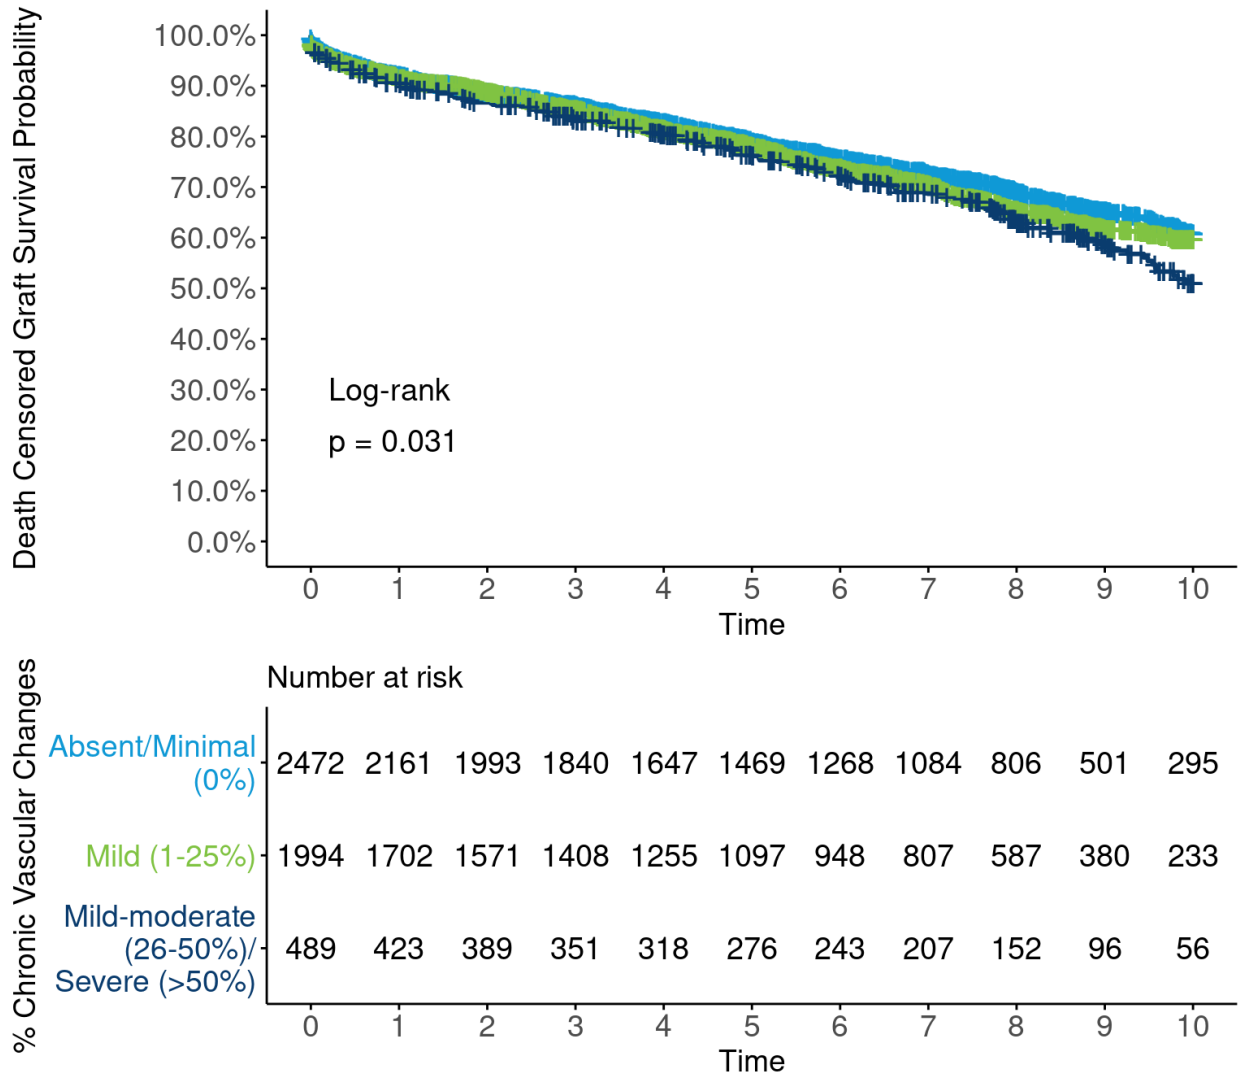

Figure S-11. Love Plot Showing Covariate Balance Across 3-Level Glomerulosclerosis after Propensity Score Inverse Probability Weighting

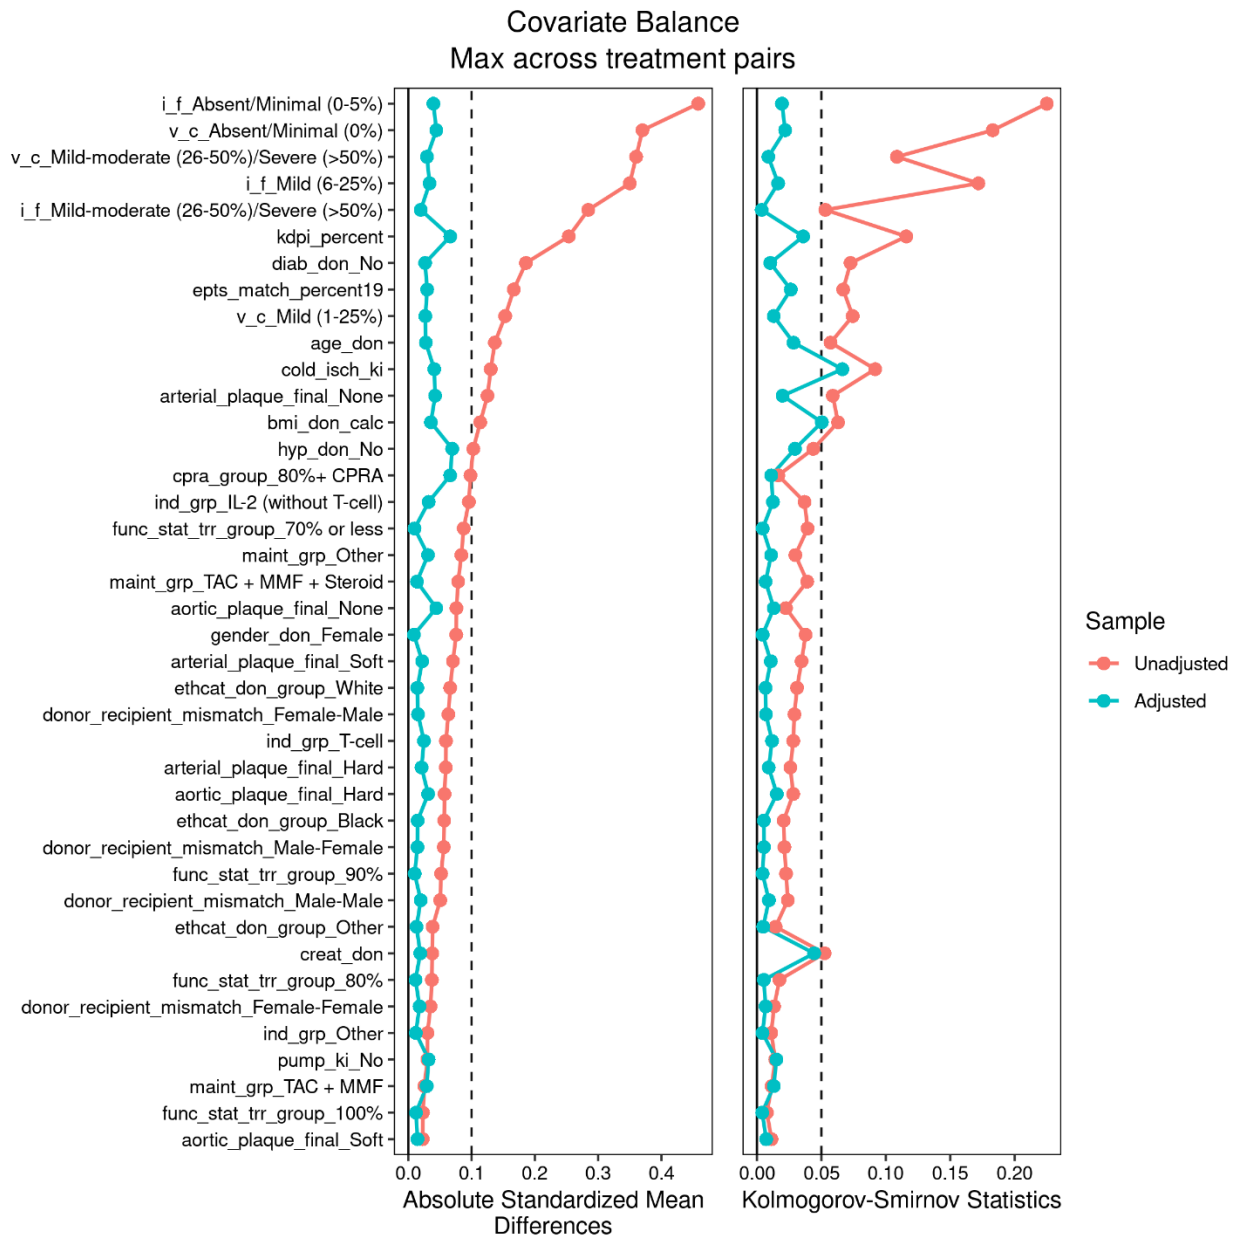

Figure S-12. Love Plot Showing Covariate Balance Across 3-Level Interstitial Fibrosis after Propensity Score Inverse Probability Weighting

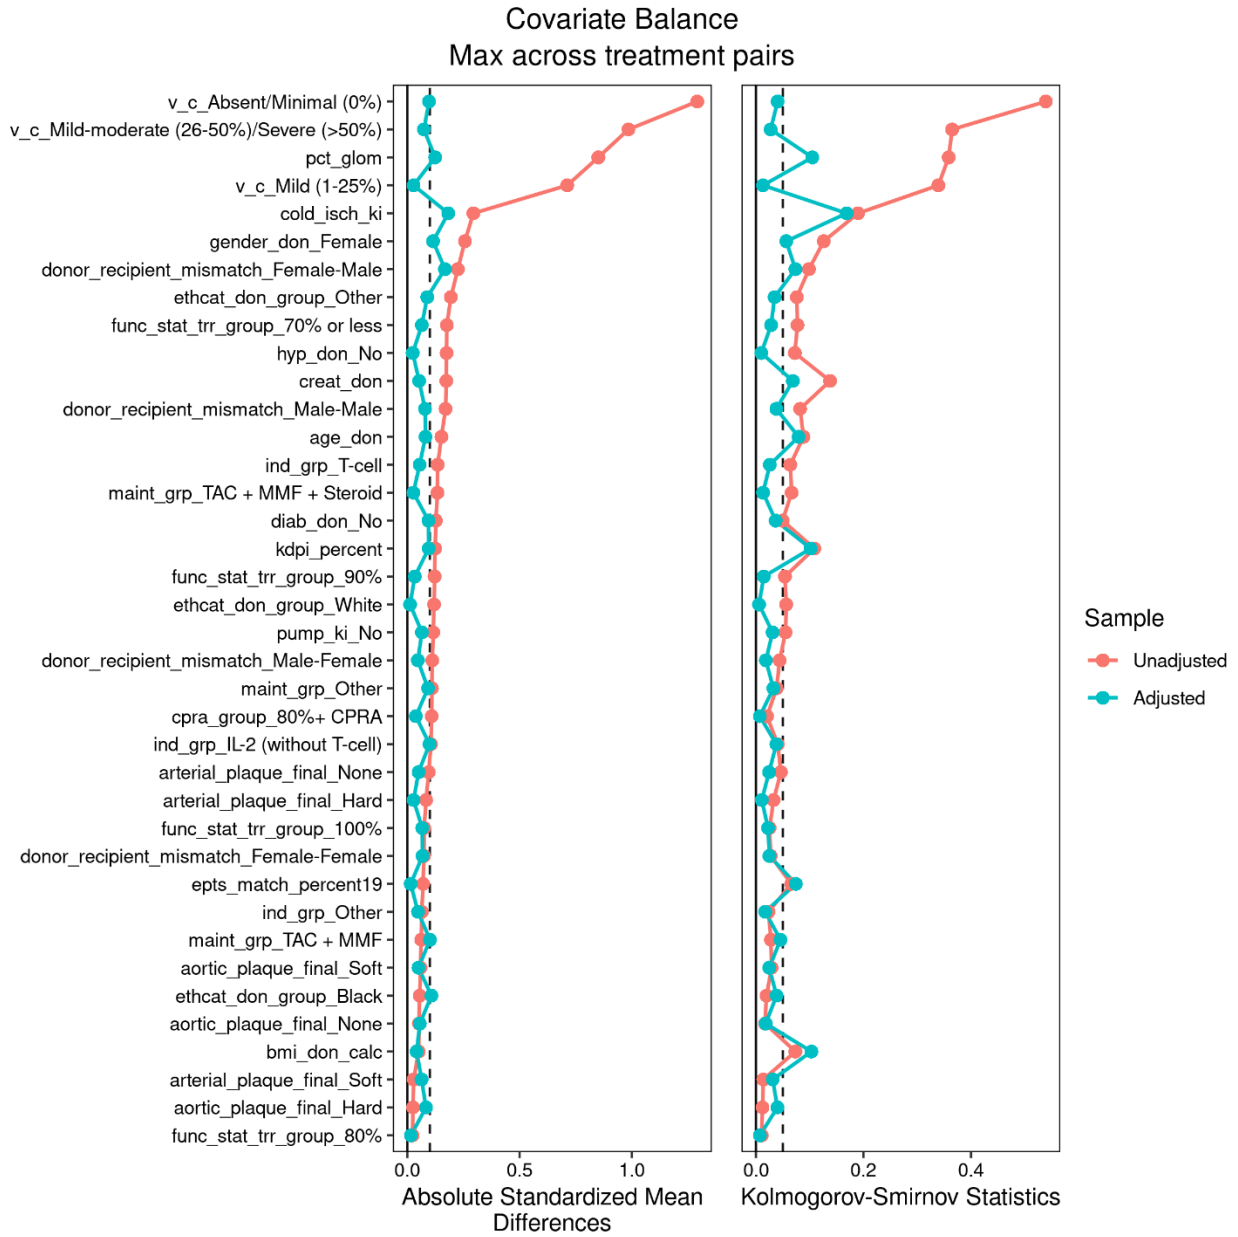

Figure S-13. Love Plot Showing Covariate Balance Across 3-Level Vascular Changes after Propensity Score Inverse Probability Weighting

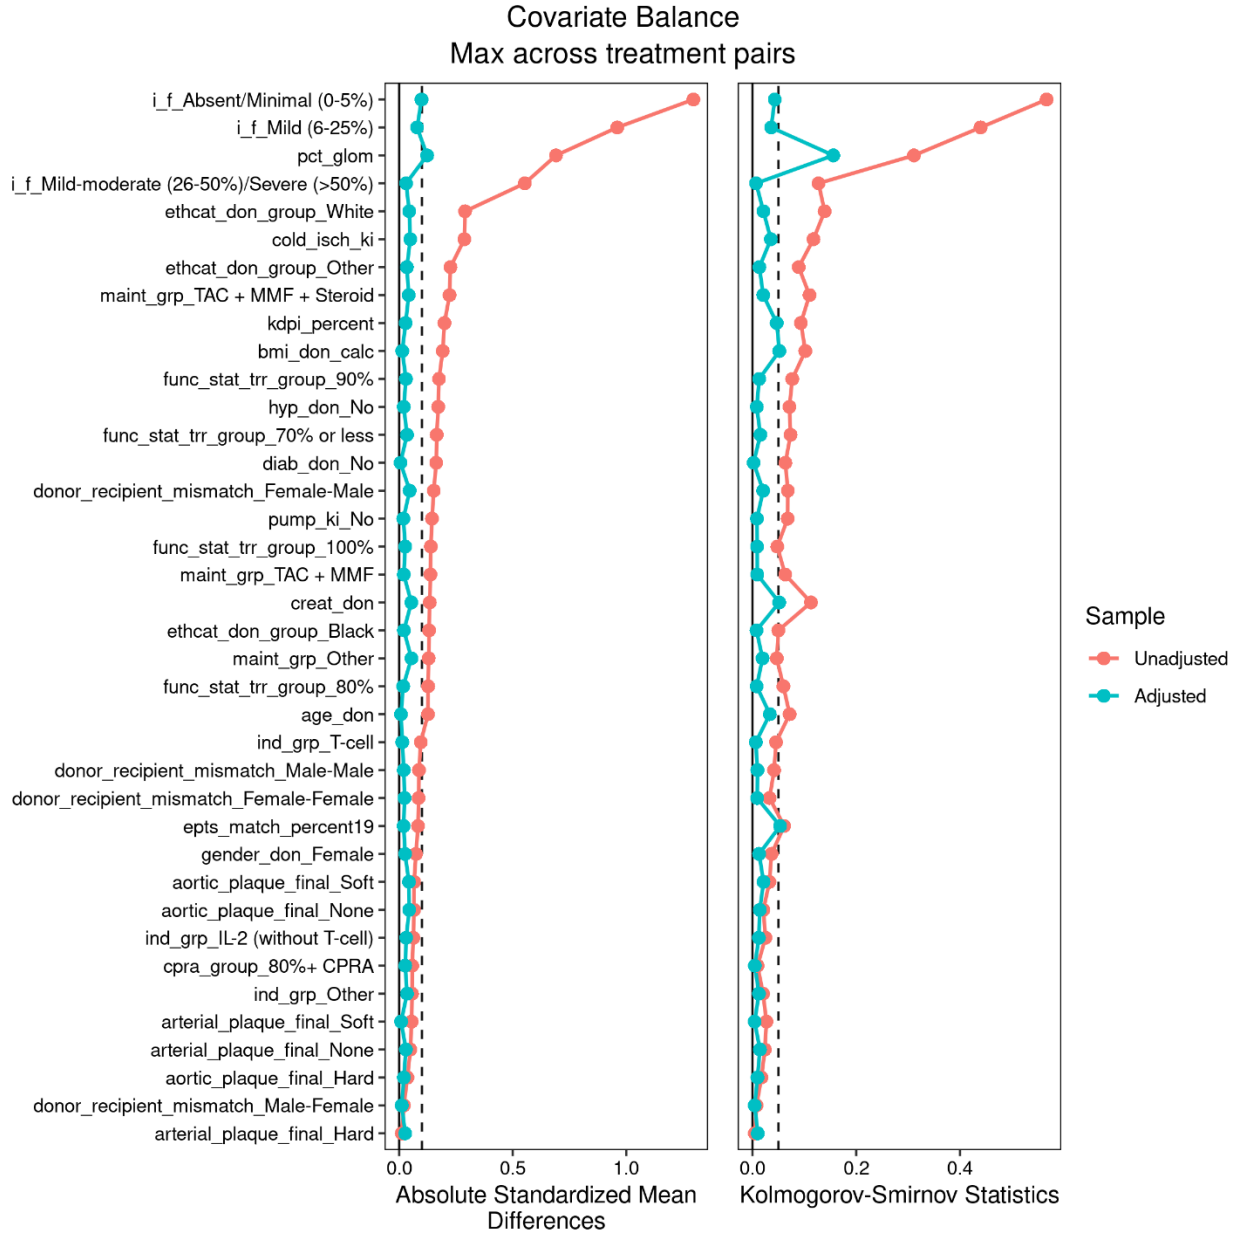

Figure S-14. Correlation between Left vs. Right Kidney Glomerulosclerosis in the Same Donor

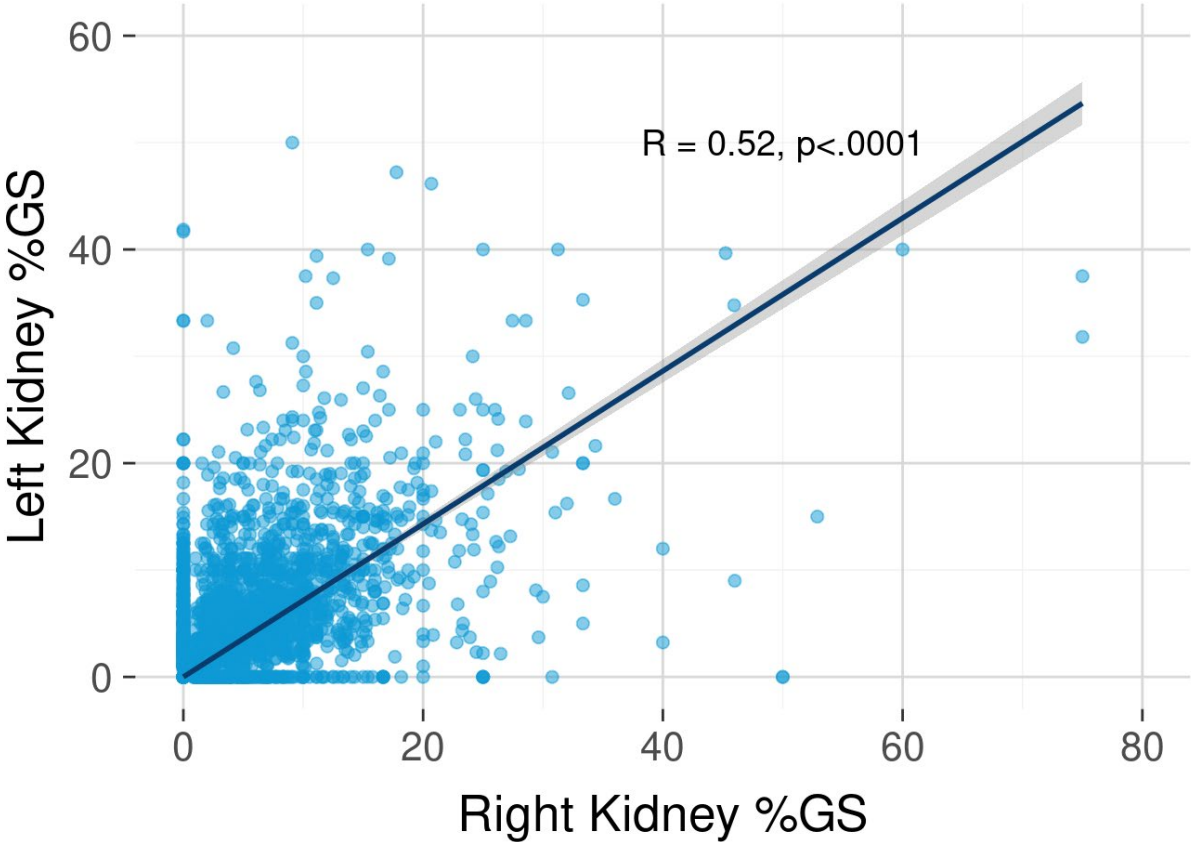

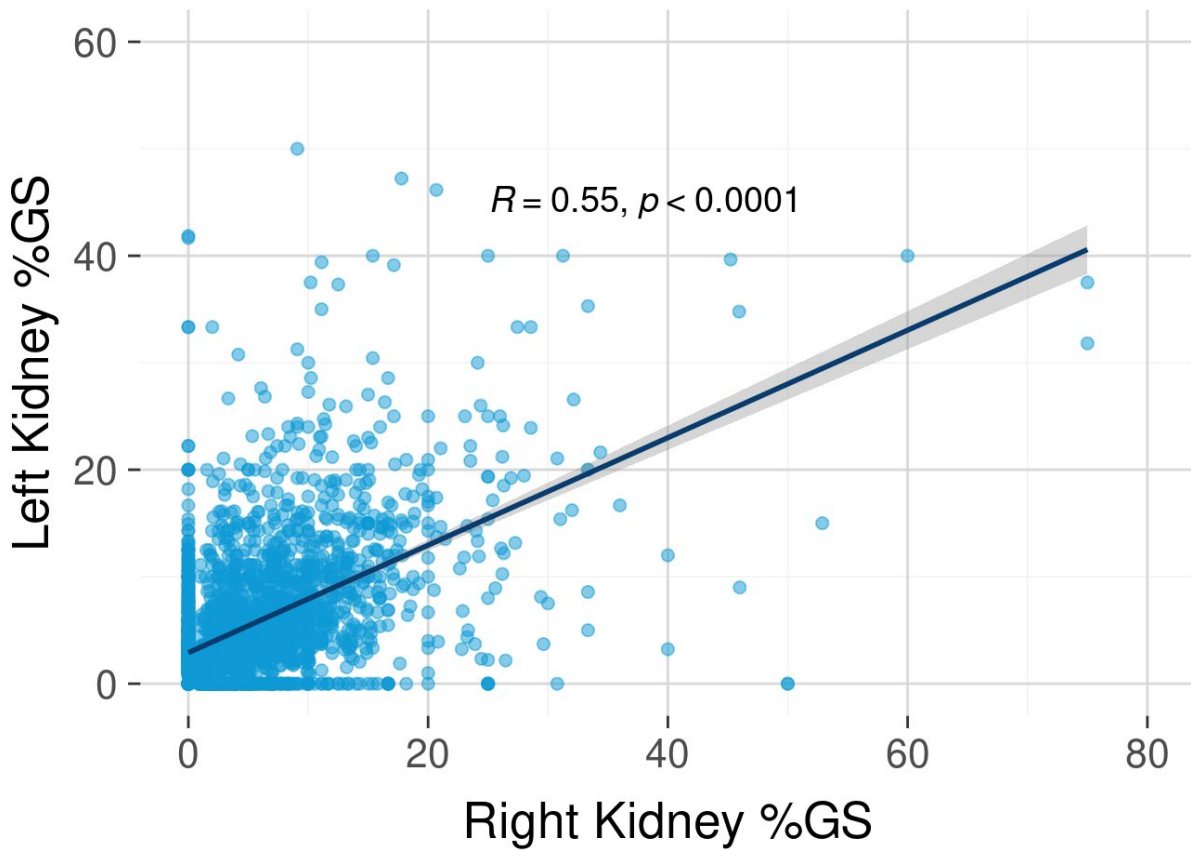



**Supplementary Table S-1.** Associations between Glomerulosclerosis and Modeled Covariates, 2008-2012 Biopsied ECD Kidney Transplants

|                                  | Glomerulosclerosis |                   |                   |                   |                 | p value              |
|----------------------------------|--------------------|-------------------|-------------------|-------------------|-----------------|----------------------|
|                                  | 0-5%<br>(N=3617)   | 6-10%<br>(N=1322) | 11-15%<br>(N=592) | 16-20%<br>(N=247) | 21%+<br>(N=219) |                      |
| <b>Donor Age</b>                 |                    |                   |                   |                   |                 | 0.0007 <sup>1</sup>  |
| N                                | 3617               | 1322              | 592               | 247               | 219             |                      |
| Missing                          | 0                  | 0                 | 0                 | 0                 | 0               |                      |
| Mean (SD)                        | 59.4 (5.8)         | 60.2 (6.1)        | 60.2 (6.2)        | 59.5 (6.0)        | 59.9 (6.3)      |                      |
| <b>KDPI</b>                      |                    |                   |                   |                   |                 | <0.0001 <sup>1</sup> |
| N                                | 3584               | 1308              | 585               | 242               | 218             |                      |
| Missing                          | 33                 | 14                | 7                 | 5                 | 1               |                      |
| Mean (SD)                        | 80.7 (11.4)        | 82.7 (11.1)       | 83.9 (10.4)       | 82.7 (10.9)       | 83.7 (10.7)     |                      |
| <b>Donor BMI</b>                 |                    |                   |                   |                   |                 | 0.0043 <sup>1</sup>  |
| N                                | 3610               | 1320              | 592               | 247               | 219             |                      |
| Missing                          | 7                  | 2                 | 0                 | 0                 | 0               |                      |
| Mean (SD)                        | 28.9 (6.4)         | 29.2 (6.4)        | 29.3 (6.6)        | 30.3 (6.9)        | 29.7 (7.2)      |                      |
| <b>Donor Gender</b>              |                    |                   |                   |                   |                 | 0.1132 <sup>2</sup>  |
| Female                           | 1648 (45.6%)       | 643 (48.6%)       | 297 (50.2%)       | 116 (47.0%)       | 109 (49.8%)     |                      |
| Male                             | 1969 (54.4%)       | 679 (51.4%)       | 295 (49.8%)       | 131 (53.0%)       | 110 (50.2%)     |                      |
| <b>Donor Terminal Creatinine</b> |                    |                   |                   |                   |                 | 0.0391 <sup>1</sup>  |
| N                                | 3617               | 1322              | 592               | 247               | 219             |                      |
| Missing                          | 0                  | 0                 | 0                 | 0                 | 0               |                      |
| Mean (SD)                        | 1.1 (0.9)          | 1.1 (0.6)         | 1.1 (0.5)         | 1.2 (0.6)         | 1.1 (0.5)       |                      |
| <b>Donor Race/Ethnicity</b>      |                    |                   |                   |                   |                 | 0.3327 <sup>2</sup>  |
| White                            | 2468 (68.2%)       | 890 (67.3%)       | 370 (62.5%)       | 168 (68.0%)       | 151 (68.9%)     |                      |

| Glomerulosclerosis                   |                  |                   |                   |                   |                 |                      |
|--------------------------------------|------------------|-------------------|-------------------|-------------------|-----------------|----------------------|
|                                      | 0-5%<br>(N=3617) | 6-10%<br>(N=1322) | 11-15%<br>(N=592) | 16-20%<br>(N=247) | 21%+<br>(N=219) | p value              |
| Black                                | 562 (15.5%)      | 200 (15.1%)       | 111 (18.8%)       | 39 (15.8%)        | 32 (14.6%)      |                      |
| Other                                | 587 (16.2%)      | 232 (17.5%)       | 111 (18.8%)       | 40 (16.2%)        | 36 (16.4%)      |                      |
| <b>Donor History of Hypertension</b> |                  |                   |                   |                   |                 | 0.0086 <sup>2</sup>  |
| Missing                              | 13               | 8                 | 4                 | 4                 | 0               |                      |
| Yes                                  | 2691 (74.7%)     | 986 (75.0%)       | 455 (77.4%)       | 188 (77.4%)       | 186 (84.9%)     |                      |
| No                                   | 913 (25.3%)      | 328 (25.0%)       | 133 (22.6%)       | 55 (22.6%)        | 33 (15.1%)      |                      |
| <b>Donor Diabetes</b>                |                  |                   |                   |                   |                 | <0.0001 <sup>2</sup> |
| Missing                              | 27               | 11                | 3                 | 3                 | 1               |                      |
| Yes                                  | 544 (15.2%)      | 251 (19.1%)       | 120 (20.4%)       | 56 (23.0%)        | 60 (27.5%)      |                      |
| No                                   | 3046 (84.8%)     | 1060 (80.9%)      | 469 (79.6%)       | 188 (77.0%)       | 158 (72.5%)     |                      |
| <b>Interstitial Fibrosis</b>         |                  |                   |                   |                   |                 | <0.0001 <sup>2</sup> |
| Missing                              | 325              | 108               | 51                | 18                | 17              |                      |
| Absent/Minimal (0-5%)                | 2226 (67.6%)     | 655 (54.0%)       | 254 (47.0%)       | 96 (41.9%)        | 60 (29.7%)      |                      |
| Mild (6-25%)                         | 1013 (30.8%)     | 523 (43.1%)       | 257 (47.5%)       | 124 (54.1%)       | 110 (54.5%)     |                      |
| Mild-moderate (26-50%)/Severe (>50%) | 53 (1.6%)        | 36 (3.0%)         | 30 (5.5%)         | 9 (3.9%)          | 32 (15.8%)      |                      |
| <b>Chronic Vascular Changes</b>      |                  |                   |                   |                   |                 | <0.0001 <sup>2</sup> |
| Missing                              | 688              | 217               | 93                | 52                | 30              |                      |
| Absent/Minimal (0%)                  | 1648 (56.3%)     | 487 (44.1%)       | 192 (38.5%)       | 57 (29.2%)        | 57 (30.2%)      |                      |
| Mild (1-25%)                         | 1096 (37.4%)     | 486 (44.0%)       | 225 (45.1%)       | 101 (51.8%)       | 82 (43.4%)      |                      |
| Mild-moderate (26-50%)/Severe (>50%) | 185 (6.3%)       | 132 (11.9%)       | 82 (16.4%)        | 37 (19.0%)        | 50 (26.5%)      |                      |
| <b>Arterial Plaque</b>               |                  |                   |                   |                   |                 | 0.0007 <sup>2</sup>  |
| Missing                              | 620              | 208               | 84                | 37                | 39              |                      |
| Hard                                 | 496 (16.5%)      | 230 (20.6%)       | 108 (21.3%)       | 41 (19.5%)        | 37 (20.6%)      |                      |
| Soft                                 | 1208 (40.3%)     | 438 (39.3%)       | 230 (45.3%)       | 91 (43.3%)        | 75 (41.7%)      |                      |
| None                                 | 1293 (43.1%)     | 446 (40.0%)       | 170 (33.5%)       | 78 (37.1%)        | 68 (37.8%)      |                      |
| <b>Aortic Plaque</b>                 |                  |                   |                   |                   |                 | 0.1240 <sup>2</sup>  |

| Glomerulosclerosis                         |                  |                   |                   |                   |                 |                      |
|--------------------------------------------|------------------|-------------------|-------------------|-------------------|-----------------|----------------------|
|                                            | 0-5%<br>(N=3617) | 6-10%<br>(N=1322) | 11-15%<br>(N=592) | 16-20%<br>(N=247) | 21%+<br>(N=219) | p value              |
| Missing                                    | 411              | 121               | 50                | 21                | 22              |                      |
| Hard                                       | 1116 (34.8%)     | 461 (38.4%)       | 209 (38.6%)       | 85 (37.6%)        | 78 (39.6%)      |                      |
| Soft                                       | 1694 (52.8%)     | 613 (51.0%)       | 286 (52.8%)       | 117 (51.8%)       | 98 (49.7%)      |                      |
| None                                       | 396 (12.4%)      | 127 (10.6%)       | 47 (8.7%)         | 24 (10.6%)        | 21 (10.7%)      |                      |
| <b>Recipient EPTS</b>                      |                  |                   |                   |                   |                 | <0.0001 <sup>1</sup> |
| N                                          | 3587             | 1313              | 585               | 246               | 216             |                      |
| Missing                                    | 30               | 9                 | 7                 | 1                 | 3               |                      |
| Mean (SD)                                  | 64.3 (25.8)      | 66.4 (24.3)       | 67.9 (25.4)       | 69.8 (24.0)       | 69.9 (23.0)     |                      |
| <b>Recipient Functional Status</b>         |                  |                   |                   |                   |                 | 0.2073 <sup>2</sup>  |
| Missing                                    | 90               | 30                | 8                 | 5                 | 7               |                      |
| 100%                                       | 449 (12.7%)      | 172 (13.3%)       | 76 (13.0%)        | 22 (9.1%)         | 27 (12.7%)      |                      |
| 90%                                        | 878 (24.9%)      | 326 (25.2%)       | 157 (26.9%)       | 61 (25.2%)        | 66 (31.1%)      |                      |
| 80%                                        | 1168 (33.1%)     | 423 (32.7%)       | 195 (33.4%)       | 86 (35.5%)        | 78 (36.8%)      |                      |
| 70% or less                                | 1032 (29.3%)     | 371 (28.7%)       | 156 (26.7%)       | 73 (30.2%)        | 41 (19.3%)      |                      |
| <b>Recipient CPRA</b>                      |                  |                   |                   |                   |                 | 0.0376 <sup>2</sup>  |
| <80% CPRA                                  | 3482 (96.3%)     | 1283 (97.0%)      | 576 (97.3%)       | 242 (98.0%)       | 218 (99.5%)     |                      |
| 80%+ CPRA                                  | 135 (3.7%)       | 39 (3.0%)         | 16 (2.7%)         | 5 (2.0%)          | 1 (0.5%)        |                      |
| <b>Recipient Immunosuppression Regimen</b> |                  |                   |                   |                   |                 | 0.0528 <sup>2</sup>  |
| TAC + MMF + Steroid                        | 2124 (58.7%)     | 744 (56.3%)       | 337 (56.9%)       | 136 (55.1%)       | 107 (48.9%)     |                      |
| TAC + MMF                                  | 1023 (28.3%)     | 371 (28.1%)       | 163 (27.5%)       | 73 (29.6%)        | 73 (33.3%)      |                      |
| Other                                      | 470 (13.0%)      | 207 (15.7%)       | 92 (15.5%)        | 38 (15.4%)        | 39 (17.8%)      |                      |
| <b>Recipient Induction Therapy</b>         |                  |                   |                   |                   |                 | 0.4117 <sup>2</sup>  |
| T-cell                                     | 2339 (64.7%)     | 858 (64.9%)       | 400 (67.6%)       | 165 (66.8%)       | 149 (68.0%)     |                      |
| IL-2 (without T-cell)                      | 692 (19.1%)      | 260 (19.7%)       | 96 (16.2%)        | 43 (17.4%)        | 30 (13.7%)      |                      |
| Other                                      | 586 (16.2%)      | 204 (15.4%)       | 96 (16.2%)        | 39 (15.8%)        | 40 (18.3%)      |                      |
| <b>Cold Ischemic Time</b>                  |                  |                   |                   |                   |                 | 0.0006 <sup>1</sup>  |

| Glomerulosclerosis              |                  |                   |                   |                   |                 |                     |
|---------------------------------|------------------|-------------------|-------------------|-------------------|-----------------|---------------------|
|                                 | 0-5%<br>(N=3617) | 6-10%<br>(N=1322) | 11-15%<br>(N=592) | 16-20%<br>(N=247) | 21%+<br>(N=219) | p value             |
| N                               | 3542             | 1296              | 584               | 241               | 214             |                     |
| Missing                         | 75               | 26                | 8                 | 6                 | 5               |                     |
| Mean (SD)                       | 19.1 (9.2)       | 19.5 (9.9)        | 20.3 (10.0)       | 21.0 (8.6)        | 20.2 (10.0)     |                     |
| <b>Pumped by OPO or TXC</b>     |                  |                   |                   |                   |                 | 0.4836 <sup>2</sup> |
| Yes                             | 2376 (65.7%)     | 887 (67.1%)       | 386 (65.2%)       | 172 (69.6%)       | 152 (69.4%)     |                     |
| No                              | 1241 (34.3%)     | 435 (32.9%)       | 206 (34.8%)       | 75 (30.4%)        | 67 (30.6%)      |                     |
| <b>Donor-Recipient Mismatch</b> |                  |                   |                   |                   |                 | 0.3096 <sup>2</sup> |
| Female-Female                   | 615 (17.0%)      | 227 (17.2%)       | 102 (17.2%)       | 50 (20.2%)        | 42 (19.2%)      |                     |
| Female-Male                     | 1033 (28.6%)     | 416 (31.5%)       | 195 (32.9%)       | 66 (26.7%)        | 67 (30.6%)      |                     |
| Male-Female                     | 679 (18.8%)      | 220 (16.6%)       | 106 (17.9%)       | 46 (18.6%)        | 32 (14.6%)      |                     |
| Male-Male                       | 1290 (35.7%)     | 459 (34.7%)       | 189 (31.9%)       | 85 (34.4%)        | 78 (35.6%)      |                     |

<sup>1</sup>Kruskal Wallis <sup>2</sup>Chi-Square

(report generated on 29APR2021)

**Supplementary Table S-2.** Associations between Interstitial Fibrosis and Modeled Covariates, 2008-2012 Biopsied ECD Kidney Transplants

|                                      | Interstitial Fibrosis             |                          |                                                 | p value              |
|--------------------------------------|-----------------------------------|--------------------------|-------------------------------------------------|----------------------|
|                                      | Absent/Minimal (0-5%)<br>(N=3328) | Mild (6-25%)<br>(N=2037) | Mild-moderate (26-50%)/Severe (>50%)<br>(N=163) |                      |
| <b>Donor Age</b>                     |                                   |                          |                                                 | 0.2348 <sup>1</sup>  |
| N                                    | 3328                              | 2037                     | 163                                             |                      |
| Missing                              | 0                                 | 0                        | 0                                               |                      |
| Mean (SD)                            | 59.7 (6.0)                        | 59.8 (5.9)               | 59.0 (5.2)                                      |                      |
| <b>KDPI</b>                          |                                   |                          |                                                 | 0.0205 <sup>1</sup>  |
| N                                    | 3289                              | 2018                     | 163                                             |                      |
| Missing                              | 39                                | 19                       | 0                                               |                      |
| Mean (SD)                            | 81.4 (11.4)                       | 82.3 (11.0)              | 82.7 (9.7)                                      |                      |
| <b>Donor BMI</b>                     |                                   |                          |                                                 | 0.9589 <sup>1</sup>  |
| N                                    | 3323                              | 2033                     | 163                                             |                      |
| Missing                              | 5                                 | 4                        | 0                                               |                      |
| Mean (SD)                            | 29.1 (6.5)                        | 29.0 (6.4)               | 28.7 (6.1)                                      |                      |
| <b>Donor Gender</b>                  |                                   |                          |                                                 | <0.0001 <sup>2</sup> |
| Female                               | 1645 (49.4%)                      | 866 (42.5%)              | 60 (36.8%)                                      |                      |
| Male                                 | 1683 (50.6%)                      | 1171 (57.5%)             | 103 (63.2%)                                     |                      |
| <b>Donor Terminal Creatinine</b>     |                                   |                          |                                                 | <0.0001 <sup>1</sup> |
| N                                    | 3328                              | 2037                     | 163                                             |                      |
| Missing                              | 0                                 | 0                        | 0                                               |                      |
| Mean (SD)                            | 1.1 (0.6)                         | 1.2 (0.7)                | 1.2 (0.5)                                       |                      |
| <b>Donor Race/Ethnicity</b>          |                                   |                          |                                                 | <0.0001 <sup>2</sup> |
| White                                | 2311 (69.4%)                      | 1305 (64.1%)             | 104 (63.8%)                                     |                      |
| Black                                | 535 (16.1%)                       | 308 (15.1%)              | 23 (14.1%)                                      |                      |
| Other                                | 482 (14.5%)                       | 424 (20.8%)              | 36 (22.1%)                                      |                      |
| <b>Donor History of Hypertension</b> |                                   |                          |                                                 | 0.0844 <sup>2</sup>  |

| Interstitial Fibrosis                |                                   |                          |                                                 |                      |
|--------------------------------------|-----------------------------------|--------------------------|-------------------------------------------------|----------------------|
|                                      | Absent/Minimal (0-5%)<br>(N=3328) | Mild (6-25%)<br>(N=2037) | Mild-moderate (26-50%)/Severe (>50%)<br>(N=163) | p value              |
| Missing                              | 16                                | 13                       | 0                                               |                      |
| Yes                                  | 2484 (75.0%)                      | 1543 (76.2%)             | 134 (82.2%)                                     |                      |
| No                                   | 828 (25.0%)                       | 481 (23.8%)              | 29 (17.8%)                                      |                      |
| <b>Donor Diabetes</b>                |                                   |                          |                                                 | 0.2486 <sup>2</sup>  |
| Missing                              | 33                                | 10                       | 0                                               |                      |
| Yes                                  | 561 (17.0%)                       | 351 (17.3%)              | 36 (22.1%)                                      |                      |
| No                                   | 2734 (83.0%)                      | 1676 (82.7%)             | 127 (77.9%)                                     |                      |
| <b>Percent Glomerulosclerosis</b>    |                                   |                          |                                                 | <0.0001 <sup>1</sup> |
| N                                    | 3291                              | 2027                     | 160                                             |                      |
| Missing                              | 37                                | 10                       | 3                                               |                      |
| Mean (SD)                            | 4.7 (5.8)                         | 7.6 (7.7)                | 11.6 (9.9)                                      |                      |
| <b>Chronic Vascular Changes</b>      |                                   |                          |                                                 | <0.0001 <sup>2</sup> |
| Missing                              | 585                               | 168                      | 14                                              |                      |
| Absent/Minimal (0%)                  | 1901 (69.3%)                      | 445 (23.8%)              | 24 (16.1%)                                      |                      |
| Mild (1-25%)                         | 733 (26.7%)                       | 1129 (60.4%)             | 62 (41.6%)                                      |                      |
| Mild-moderate (26-50%)/Severe (>50%) | 109 (4.0%)                        | 295 (15.8%)              | 63 (42.3%)                                      |                      |
| <b>Arterial Plaque</b>               |                                   |                          |                                                 | 0.1600 <sup>2</sup>  |
| Missing                              | 537                               | 363                      | 21                                              |                      |
| Hard                                 | 488 (17.5%)                       | 322 (19.2%)              | 31 (21.8%)                                      |                      |
| Soft                                 | 1122 (40.2%)                      | 700 (41.8%)              | 55 (38.7%)                                      |                      |
| None                                 | 1181 (42.3%)                      | 652 (38.9%)              | 56 (39.4%)                                      |                      |
| <b>Aortic Plaque</b>                 |                                   |                          |                                                 | 0.5097 <sup>2</sup>  |
| Missing                              | 361                               | 175                      | 20                                              |                      |
| Hard                                 | 1072 (36.1%)                      | 663 (35.6%)              | 57 (39.9%)                                      |                      |
| Soft                                 | 1540 (51.9%)                      | 997 (53.5%)              | 68 (47.6%)                                      |                      |
| None                                 | 355 (12.0%)                       | 202 (10.8%)              | 18 (12.6%)                                      |                      |

| Interstitial Fibrosis                      |                                   |                          |                                                 |                      |
|--------------------------------------------|-----------------------------------|--------------------------|-------------------------------------------------|----------------------|
|                                            | Absent/Minimal (0-5%)<br>(N=3328) | Mild (6-25%)<br>(N=2037) | Mild-moderate (26-50%)/Severe (>50%)<br>(N=163) | p value              |
| <b>Recipient EPTS</b>                      |                                   |                          |                                                 |                      |
| N                                          | 3295                              | 2026                     | 162                                             | 0.0277 <sup>1</sup>  |
| Missing                                    | 33                                | 11                       | 1                                               |                      |
| Mean (SD)                                  | 64.9 (25.4)                       | 66.8 (24.9)              | 65.7 (25.5)                                     |                      |
| <b>Recipient Functional Status</b>         |                                   |                          |                                                 |                      |
| Missing                                    | 83                                | 34                       | 0                                               | <0.0001 <sup>2</sup> |
| 100%                                       | 378 (11.6%)                       | 286 (14.3%)              | 23 (14.1%)                                      |                      |
| 90%                                        | 763 (23.5%)                       | 583 (29.1%)              | 47 (28.8%)                                      |                      |
| 80%                                        | 1086 (33.5%)                      | 666 (33.3%)              | 53 (32.5%)                                      |                      |
| 70% or less                                | 1018 (31.4%)                      | 468 (23.4%)              | 40 (24.5%)                                      |                      |
| <b>Recipient CPRA</b>                      |                                   |                          |                                                 |                      |
| <80% CPRA                                  | 3210 (96.5%)                      | 1979 (97.2%)             | 155 (95.1%)                                     | 0.2002 <sup>2</sup>  |
| 80%+ CPRA                                  | 118 (3.5%)                        | 58 (2.8%)                | 8 (4.9%)                                        |                      |
| <b>Recipient Immunosuppression Regimen</b> |                                   |                          |                                                 |                      |
| TAC + MMF + Steroid                        | 1982 (59.6%)                      | 1078 (52.9%)             | 93 (57.1%)                                      | <0.0001 <sup>2</sup> |
| TAC + MMF                                  | 925 (27.8%)                       | 623 (30.6%)              | 46 (28.2%)                                      |                      |
| Other                                      | 421 (12.7%)                       | 336 (16.5%)              | 24 (14.7%)                                      |                      |
| <b>Recipient Induction Therapy</b>         |                                   |                          |                                                 |                      |
| T-cell                                     | 2204 (66.2%)                      | 1282 (62.9%)             | 113 (69.3%)                                     | 0.0310 <sup>2</sup>  |
| IL-2 (without T-cell)                      | 578 (17.4%)                       | 420 (20.6%)              | 27 (16.6%)                                      |                      |
| Other                                      | 546 (16.4%)                       | 335 (16.4%)              | 23 (14.1%)                                      |                      |
| <b>Cold Ischemic Time</b>                  |                                   |                          |                                                 |                      |
| N                                          | 3252                              | 2009                     | 157                                             | <0.0001 <sup>1</sup> |
| Missing                                    | 76                                | 28                       | 6                                               |                      |
| Mean (SD)                                  | 18.6 (8.5)                        | 20.3 (9.5)               | 21.1 (8.8)                                      |                      |
| <b>Pumped by OPO or TXC</b>                |                                   |                          |                                                 |                      |
|                                            |                                   |                          |                                                 | 0.3461 <sup>2</sup>  |

---

Interstitial Fibrosis

|                                 | Absent/Minimal (0-5%)<br>(N=3328) | Mild (6-25%)<br>(N=2037) | Mild-moderate (26-50%)/Severe (>50%)<br>(N=163) | p value              |
|---------------------------------|-----------------------------------|--------------------------|-------------------------------------------------|----------------------|
| Yes                             | 2225 (66.9%)                      | 1358 (66.7%)             | 100 (61.3%)                                     |                      |
| No                              | 1103 (33.1%)                      | 679 (33.3%)              | 63 (38.7%)                                      |                      |
| <b>Donor-Recipient Mismatch</b> |                                   |                          |                                                 | <0.0001 <sup>2</sup> |
| Female-Female                   | 602 (18.1%)                       | 333 (16.3%)              | 25 (15.3%)                                      |                      |
| Female-Male                     | 1043 (31.3%)                      | 533 (26.2%)              | 35 (21.5%)                                      |                      |
| Male-Female                     | 568 (17.1%)                       | 415 (20.4%)              | 35 (21.5%)                                      |                      |
| Male-Male                       | 1115 (33.5%)                      | 756 (37.1%)              | 68 (41.7%)                                      |                      |

(report generated on 29APR2021)

<sup>1</sup>Kruskal Wallis <sup>2</sup>Chi-Square

---



**Supplementary Table S-3.** Associations between Vascular Changes and Modeled Covariates, 2008-2012 Biopsied ECD Kidney Transplants

|                                      | Chronic Vascular Changes        |                          |                                                 | p value              |
|--------------------------------------|---------------------------------|--------------------------|-------------------------------------------------|----------------------|
|                                      | Absent/Minimal (0%)<br>(N=2472) | Mild (1-25%)<br>(N=1994) | Mild-moderate (26-50%)/Severe (>50%)<br>(N=489) |                      |
| <b>Donor Age</b>                     |                                 |                          |                                                 | 0.0038 <sup>1</sup>  |
| N                                    | 2472                            | 1994                     | 489                                             |                      |
| Missing                              | 0                               | 0                        | 0                                               |                      |
| Mean (SD)                            | 59.4 (5.9)                      | 59.9 (5.9)               | 59.2 (6.0)                                      |                      |
| <b>KDPI</b>                          |                                 |                          |                                                 | <0.0001 <sup>1</sup> |
| N                                    | 2440                            | 1970                     | 487                                             |                      |
| Missing                              | 32                              | 24                       | 2                                               |                      |
| Mean (SD)                            | 80.7 (11.5)                     | 82.8 (10.9)              | 83.0 (11.0)                                     |                      |
| <b>Donor BMI</b>                     |                                 |                          |                                                 | 0.0009 <sup>1</sup>  |
| N                                    | 2466                            | 1991                     | 489                                             |                      |
| Missing                              | 6                               | 3                        | 0                                               |                      |
| Mean (SD)                            | 28.8 (6.2)                      | 29.0 (6.4)               | 30.1 (7.1)                                      |                      |
| <b>Donor Gender</b>                  |                                 |                          |                                                 | 0.0814 <sup>2</sup>  |
| Female                               | 1198 (48.5%)                    | 906 (45.4%)              | 219 (44.8%)                                     |                      |
| Male                                 | 1274 (51.5%)                    | 1088 (54.6%)             | 270 (55.2%)                                     |                      |
| <b>Donor Terminal Creatinine</b>     |                                 |                          |                                                 | <0.0001 <sup>1</sup> |
| N                                    | 2472                            | 1994                     | 489                                             |                      |
| Missing                              | 0                               | 0                        | 0                                               |                      |
| Mean (SD)                            | 1.1 (0.6)                       | 1.2 (0.8)                | 1.2 (0.5)                                       |                      |
| <b>Donor Race/Ethnicity</b>          |                                 |                          |                                                 | <0.0001 <sup>2</sup> |
| White                                | 1724 (69.7%)                    | 1261 (63.2%)             | 273 (55.8%)                                     |                      |
| Black                                | 377 (15.3%)                     | 338 (17.0%)              | 99 (20.2%)                                      |                      |
| Other                                | 371 (15.0%)                     | 395 (19.8%)              | 117 (23.9%)                                     |                      |
| <b>Donor History of Hypertension</b> |                                 |                          |                                                 | 0.0038 <sup>2</sup>  |

Chronic Vascular Changes

|                                      | Absent/Minimal (0%)<br>(N=2472) | Mild (1-25%)<br>(N=1994) | Mild-moderate (26-50%)/Severe (>50%)<br>(N=489) | p value              |
|--------------------------------------|---------------------------------|--------------------------|-------------------------------------------------|----------------------|
| Missing                              | 15 (.%)                         | 12 (.%)                  | 1 (.%)                                          |                      |
| Yes                                  | 1846 (75.1%)                    | 1510 (76.2%)             | 401 (82.2%)                                     |                      |
| No                                   | 611 (24.9%)                     | 472 (23.8%)              | 87 (17.8%)                                      |                      |
| <b>Donor Diabetes</b>                |                                 |                          |                                                 | 0.0007 <sup>2</sup>  |
| Missing                              | 22 (.%)                         | 18 (.%)                  | 1 (.%)                                          |                      |
| Yes                                  | 382 (15.6%)                     | 364 (18.4%)              | 108 (22.1%)                                     |                      |
| No                                   | 2068 (84.4%)                    | 1612 (81.6%)             | 380 (77.9%)                                     |                      |
| <b>Percent Glomerulosclerosis</b>    |                                 |                          |                                                 | <0.0001 <sup>1</sup> |
| N                                    | 2441                            | 1990                     | 486                                             |                      |
| Missing                              | 31                              | 4                        | 3                                               |                      |
| Mean (SD)                            | 4.8 (6.0)                       | 6.7 (6.7)                | 9.9 (9.1)                                       |                      |
| <b>Interstitial Fibrosis</b>         |                                 |                          |                                                 | <0.0001 <sup>2</sup> |
| Missing                              | 102 (.%)                        | 70 (.%)                  | 22 (.%)                                         |                      |
| Absent/Minimal (0-5%)                | 1901 (80.2%)                    | 733 (38.1%)              | 109 (23.3%)                                     |                      |
| Mild (6-25%)                         | 445 (18.8%)                     | 1129 (58.7%)             | 295 (63.2%)                                     |                      |
| Mild-moderate (26-50%)/Severe (>50%) | 24 (1.0%)                       | 62 (3.2%)                | 63 (13.5%)                                      |                      |
| <b>Arterial Plaque</b>               |                                 |                          |                                                 | 0.6849 <sup>2</sup>  |
| Missing                              | 298 (.%)                        | 422 (.%)                 | 77 (.%)                                         |                      |
| Hard                                 | 399 (18.4%)                     | 291 (18.5%)              | 77 (18.7%)                                      |                      |
| Soft                                 | 900 (41.4%)                     | 637 (40.5%)              | 182 (44.2%)                                     |                      |
| None                                 | 875 (40.2%)                     | 644 (41.0%)              | 153 (37.1%)                                     |                      |
| <b>Aortic Plaque</b>                 |                                 |                          |                                                 | 0.2800 <sup>2</sup>  |
| Missing                              | 233 (.%)                        | 193 (.%)                 | 42 (.%)                                         |                      |
| Hard                                 | 807 (36.0%)                     | 645 (35.8%)              | 155 (34.7%)                                     |                      |
| Soft                                 | 1145 (51.1%)                    | 963 (53.5%)              | 239 (53.5%)                                     |                      |
| None                                 | 287 (12.8%)                     | 193 (10.7%)              | 53 (11.9%)                                      |                      |

**Chronic Vascular Changes**

|                                            | Absent/Minimal (0%)<br>(N=2472) | Mild (1-25%)<br>(N=1994) | Mild-moderate (26-50%)/Severe (>50%)<br>(N=489) | p value              |
|--------------------------------------------|---------------------------------|--------------------------|-------------------------------------------------|----------------------|
| <b>Recipient EPTS</b>                      |                                 |                          |                                                 | 0.0181 <sup>1</sup>  |
| N                                          | 2451                            | 1976                     | 488                                             |                      |
| Missing                                    | 21                              | 18                       | 1                                               |                      |
| Mean (SD)                                  | 64.9 (25.4)                     | 66.9 (25.1)              | 65.2 (25.0)                                     |                      |
| <b>Recipient Functional Status</b>         |                                 |                          |                                                 | <0.0001 <sup>2</sup> |
| Missing                                    | 54 (.%)                         | 34 (.%)                  | 7 (.%)                                          |                      |
| 100%                                       | 266 (11.0%)                     | 284 (14.5%)              | 76 (15.8%)                                      |                      |
| 90%                                        | 514 (21.3%)                     | 576 (29.4%)              | 135 (28.0%)                                     |                      |
| 80%                                        | 878 (36.3%)                     | 589 (30.1%)              | 155 (32.2%)                                     |                      |
| 70% or less                                | 760 (31.4%)                     | 511 (26.1%)              | 116 (24.1%)                                     |                      |
| <b>Recipient CPRA</b>                      |                                 |                          |                                                 | 0.1549 <sup>2</sup>  |
| <80% CPRA                                  | 2387 (96.6%)                    | 1945 (97.5%)             | 473 (96.7%)                                     |                      |
| 80%+ CPRA                                  | 85 (3.4%)                       | 49 (2.5%)                | 16 (3.3%)                                       |                      |
| <b>Recipient Immunosuppression Regimen</b> |                                 |                          |                                                 | <0.0001 <sup>2</sup> |
| TAC + MMF + Steroid                        | 1480 (59.9%)                    | 1078 (54.1%)             | 239 (48.9%)                                     |                      |
| TAC + MMF                                  | 653 (26.4%)                     | 628 (31.5%)              | 160 (32.7%)                                     |                      |
| Other                                      | 339 (13.7%)                     | 288 (14.4%)              | 90 (18.4%)                                      |                      |
| <b>Recipient Induction Therapy</b>         |                                 |                          |                                                 | 0.4226 <sup>2</sup>  |
| T-cell                                     | 1634 (66.1%)                    | 1294 (64.9%)             | 301 (61.6%)                                     |                      |
| IL-2 (without T-cell)                      | 479 (19.4%)                     | 396 (19.9%)              | 107 (21.9%)                                     |                      |
| Other                                      | 359 (14.5%)                     | 304 (15.2%)              | 81 (16.6%)                                      |                      |
| <b>Cold Ischemic Time</b>                  |                                 |                          |                                                 | <0.0001 <sup>1</sup> |
| N                                          | 2409                            | 1959                     | 483                                             |                      |
| Missing                                    | 63                              | 35                       | 6                                               |                      |
| Mean (SD)                                  | 18.7 (8.9)                      | 20.7 (9.7)               | 21.6 (10.8)                                     |                      |
| <b>Pumped by OPO or TXC</b>                |                                 |                          |                                                 | <0.0001 <sup>2</sup> |

---

Chronic Vascular Changes

|                                 | Absent/Minimal (0%)<br>(N=2472) | Mild (1-25%)<br>(N=1994) | Mild-moderate (26-50%)/Severe (>50%)<br>(N=489) | p value             |
|---------------------------------|---------------------------------|--------------------------|-------------------------------------------------|---------------------|
| Yes                             | 1574 (63.7%)                    | 1405 (70.5%)             | 323 (66.1%)                                     |                     |
| No                              | 898 (36.3%)                     | 589 (29.5%)              | 166 (33.9%)                                     |                     |
| <b>Donor-Recipient Mismatch</b> |                                 |                          |                                                 | 0.0135 <sup>2</sup> |
| Female-Female                   | 428 (17.3%)                     | 342 (17.2%)              | 100 (20.4%)                                     |                     |
| Female-Male                     | 770 (31.1%)                     | 564 (28.3%)              | 119 (24.3%)                                     |                     |
| Male-Female                     | 462 (18.7%)                     | 357 (17.9%)              | 89 (18.2%)                                      |                     |
| Male-Male                       | 812 (32.8%)                     | 731 (36.7%)              | 181 (37.0%)                                     |                     |

(report generated on 29APR2021)

<sup>1</sup>Kruskal Wallis <sup>2</sup>Chi-Square

---

**Supplementary Table S-4.** Association between Left vs. Right Kidney Interstitial Fibrosis in the Same Donor

| <b>Left Kidney Interstitial Fibrosis</b> | <b>Right Kidney Interstitial Fibrosis</b> |                     |                                                |
|------------------------------------------|-------------------------------------------|---------------------|------------------------------------------------|
|                                          | <b>Absent/Minimal (0-5%)</b>              | <b>Mild (6-25%)</b> | <b>Mild-moderate (26-50%)/Severe (&gt;50%)</b> |
| Absent/Minimal (0-5%)                    | 1315 (57.2%)                              | 80 (3.5%)           | 3 (0.1%)                                       |
| Mild (6-25%)                             | 114 (5.0%)                                | 704 (30.6%)         | 16 (0.7%)                                      |
| Mild-moderate (26-50%)/Severe (>50%)     | 6 (0.3%)                                  | 27 (1.2%)           | 35 (1.5%)                                      |

**Supplementary Table S-5.** Association between Left vs. Right Kidney Vascular Changes in the Same Donor

| <b>Left Kidney Chronic Vascular Changes</b> | <b>Right Kidney Chronic Vascular Changes</b> |                     |                                                |
|---------------------------------------------|----------------------------------------------|---------------------|------------------------------------------------|
|                                             | <b>Absent/Minimal (0%)</b>                   | <b>Mild (1-25%)</b> | <b>Mild-moderate (26-50%)/Severe (&gt;50%)</b> |
| Absent/Minimal (0%)                         | 950 (46.7%)                                  | 73 (3.6%)           | 10 (0.5%)                                      |
| Mild (1-25%)                                | 88 (4.3%)                                    | 669 (32.9%)         | 42 (2.1%)                                      |
| Mild-moderate (26-50%)/Severe (>50%)        | 11 (0.5%)                                    | 65 (3.2%)           | 128 (6.3%)                                     |

**Supplementary Table S-6. Mate Kidney Analysis: Biopsy Finding Comparison for Transplanted vs. Discarded Kidneys from the Same Donor**

| Discarded Kidney %GS | Transplanted Kidney %GS |           |           |           |           |
|----------------------|-------------------------|-----------|-----------|-----------|-----------|
|                      | 0-5%                    | 6-10%     | 11-15%    | 16-20%    | 21%+      |
| 0-5%                 | 248 (31.0%)             | 44 (5.5%) | 17 (2.1%) | 11 (1.4%) | 6 (0.8%)  |
| 6-10%                | 67 (8.4%)               | 63 (7.9%) | 25 (3.1%) | 9 (1.1%)  | 6 (0.8%)  |
| 11-15%               | 25 (3.1%)               | 48 (6.0%) | 17 (2.1%) | 11 (1.4%) | 7 (0.9%)  |
| 16-20%               | 16 (2.0%)               | 18 (2.2%) | 19 (2.4%) | 9 (1.1%)  | 2 (0.2%)  |
| 21%+                 | 29 (3.6%)               | 36 (4.5%) | 28 (3.5%) | 17 (2.1%) | 22 (2.8%) |

Kappa Statistic:  $z=10.328$ ,  $p<0.001$

| Discarded Kidney Interstitial Fibrosis | Transplanted Kidney Interstitial Fibrosis |              |                                      |
|----------------------------------------|-------------------------------------------|--------------|--------------------------------------|
|                                        | Absent/Minimal (0-5%)                     | Mild (6-25%) | Mild-moderate (26-50%)/Severe (>50%) |
| Absent/Minimal (0-5%)                  | 312 (43.5%)                               | 32 (4.5%)    | 2 (0.3%)                             |
| Mild (6-25%)                           | 54 (7.5%)                                 | 244 (34.0%)  | 11 (1.5%)                            |
| Mild-moderate (26-50%)/Severe (>50%)   | 9 (1.3%)                                  | 34 (4.7%)    | 20 (2.8%)                            |

Kappa Statistic:  $z=19.464$ ,  $p<0.001$

| Discarded Kidney Chronic Vascular Changes | Transplanted Kidney Chronic Vascular Changes |              |                                      |
|-------------------------------------------|----------------------------------------------|--------------|--------------------------------------|
|                                           | Absent/Minimal (0%)                          | Mild (1-25%) | Mild-moderate (26-50%)/Severe (>50%) |
| Absent/Minimal (0%)                       | 239 (37.1%)                                  | 27 (4.2%)    | 4 (0.6%)                             |
| Mild (1-25%)                              | 31 (4.8%)                                    | 221 (34.3%)  | 15 (2.3%)                            |
| Mild-moderate (26-50%)/Severe (>50%)      | 9 (1.4%)                                     | 34 (5.3%)    | 64 (9.9%)                            |

Kappa Statistic:  $z=22.382$ ,  $p<0.001$

**Supplementary Table S-7.** Number of Glomeruli Observed and Glomerulosclerosis by Biopsy Sample Type

|               | Number of Glomeruli Observed |              |             |             |             |
|---------------|------------------------------|--------------|-------------|-------------|-------------|
|               | 0-24                         | 25-49        | 50-74       | 75-100      | 100+        |
| Needle / Core | 227 (28.2%)                  | 343 (42.6%)  | 164 (20.4%) | 53 (6.6%)   | 18 (2.2%)   |
| Unknown       | 642 (18.8%)                  | 1301 (38.1%) | 855 (25.0%) | 332 (9.7%)  | 271 (7.9%)  |
| Wedge         | 247 (13.9%)                  | 557 (31.4%)  | 504 (28.4%) | 240 (13.5%) | 223 (12.6%) |

|               | Glomerulosclerosis |             |             |            |            |
|---------------|--------------------|-------------|-------------|------------|------------|
|               | 0-5%               | 6-10%       | 11-15%      | 16-20%     | 21%+       |
| Needle / Core | 454 (56.4%)        | 167 (20.7%) | 88 (10.9%)  | 46 (5.7%)  | 50 (6.2%)  |
| Unknown       | 2151 (62.9%)       | 734 (21.5%) | 308 (9.0%)  | 119 (3.5%) | 106 (3.1%) |
| Wedge         | 1012 (57.0%)       | 421 (23.7%) | 196 (11.0%) | 82 (4.6%)  | 63 (3.6%)  |

*The 20 cases with GS reported but not the number of glomeruli were excluded from the top table.*

**Modified STROBE Statement—checklist of items that should be included in reports of observational studies (Cohort/Cross-sectional and case-control studies)**

|                           | <b>Item No</b> | <b>Recommendation</b>                                                                                                           | <b>Authors' Statement</b>                                                                                                                                                                                                                                                           |
|---------------------------|----------------|---------------------------------------------------------------------------------------------------------------------------------|-------------------------------------------------------------------------------------------------------------------------------------------------------------------------------------------------------------------------------------------------------------------------------------|
| <b>Title and abstract</b> | 1              | (a) Indicate the study's design with a commonly used term in the title or the abstract                                          | (abstract) "we applied causal inference methods in a Cox regression framework"                                                                                                                                                                                                      |
|                           |                | (b) Provide in the abstract an informative and balanced summary of what was done and what was found                             | (abstract) Hazard ratios and confidence intervals are provided, "after adjusting for potentially confounding donor and recipient variables"                                                                                                                                         |
| <b>Introduction</b>       |                |                                                                                                                                 |                                                                                                                                                                                                                                                                                     |
| Background/rationale      | 2              | Explain the scientific background and rationale for the investigation being reported                                            | Intro describes conflicting findings in the literature relative to our specific objectives                                                                                                                                                                                          |
| Objectives                | 3              | State specific objectives, including any prespecified hypotheses                                                                | (intro) "this study seeks to estimate the degree to which the three central biopsy compartments (glomerulosclerosis, interstitial fibrosis, and vascular changes) are independently associated with long term outcomes above and beyond standard clinical and demographic factors." |
| <b>Methods</b>            |                |                                                                                                                                 |                                                                                                                                                                                                                                                                                     |
| Study design              | 4              | Present key elements of study design early in the paper                                                                         | The intro articulates our rationale for applying advanced causal inference methods instead of relying on the traditional multivariable regression approach.                                                                                                                         |
| Setting                   | 5              | Describe the setting, locations, and relevant dates, including periods of recruitment, exposure, follow-up, and data collection | U.S., kidneys recovered for transplant 2000-2012, recipients followed for up to 10 years, as explained in Methods.                                                                                                                                                                  |



|                              |    |                                                                                                                                                                                                                                                                                                                                                                                                                                                                                    |                                                                                                                                                                                                                                                                                                                                                          |
|------------------------------|----|------------------------------------------------------------------------------------------------------------------------------------------------------------------------------------------------------------------------------------------------------------------------------------------------------------------------------------------------------------------------------------------------------------------------------------------------------------------------------------|----------------------------------------------------------------------------------------------------------------------------------------------------------------------------------------------------------------------------------------------------------------------------------------------------------------------------------------------------------|
| Participants                 | 6  | <p>(a) <i>Cohort study</i>—Give the eligibility criteria, and the sources and methods of selection of participants. Describe methods of follow-up</p> <p><i>Case-control study</i>—Give the eligibility criteria, and the sources and methods of case ascertainment and control selection. Give the rationale for the choice of cases and controls</p> <p><i>Cross-sectional study</i>—Give the eligibility criteria, and the sources and methods of selection of participants</p> | Cohort study, as described in Methods, CONSORT diagram (figure 1), and follow-up summary (Table 1).                                                                                                                                                                                                                                                      |
| Variables                    | 7  | Clearly define all outcomes, exposures, predictors, potential confounders, and effect modifiers. Give diagnostic criteria, if applicable                                                                                                                                                                                                                                                                                                                                           | All-cause and death-censored graft survival, as detailed in methods. Three exposure variables (GS, IF, VC) clearly called out. Potential confounders evaluated explained in Methods; confounders adjusted for shown in Tables S-1, S-2, and S-3. The study conserved sample size/power for main effect estimation; effect modification was out of scope. |
| Data sources/<br>measurement | 8* | For each variable of interest, give sources of data and details of methods of assessment (measurement).                                                                                                                                                                                                                                                                                                                                                                            | The OPTN database is well characterized. Two citations are provided with further details about this widely used registry.                                                                                                                                                                                                                                |
| Bias                         | 9  | Describe any efforts to address potential sources of bias                                                                                                                                                                                                                                                                                                                                                                                                                          | Efforts to reduce selection bias associated with the decision to perform a “for-cause” biopsy, vis-à-vis a routine biopsy, are extensively explained. Other potential sources of bias, such as selection bias due to decisions to accept vs discard kidneys and unmeasured confounding, are also explained as limitations.                               |
| Study size                   | 10 | Explain how the study size was arrived at (if applicable)                                                                                                                                                                                                                                                                                                                                                                                                                          | 100% of ECD transplants from 2008-2012 with biopsy data were included. This cohort was chosen to allow                                                                                                                                                                                                                                                   |

|                        |    |                                                                                                                              |                                                                                                                                                                                                                                                                                                                                                                                        |
|------------------------|----|------------------------------------------------------------------------------------------------------------------------------|----------------------------------------------------------------------------------------------------------------------------------------------------------------------------------------------------------------------------------------------------------------------------------------------------------------------------------------------------------------------------------------|
|                        |    |                                                                                                                              | approximately 10 years of follow-up. Transplants prior to 2008 were not included due, in part, to lower rates of biopsy data completeness, as well as manual data entry budgetary considerations.                                                                                                                                                                                      |
| Quantitative variables | 11 | Explain how quantitative variables were handled in the analyses. If applicable, describe which groupings were chosen and why | The parameterization of glomerulosclerosis, as both a continuous and categorical variable, is explained extensively.                                                                                                                                                                                                                                                                   |
| Statistical methods    | 12 | (a) Describe all statistical methods, including those used to control for confounding                                        | The intro and methods sections articulate our rationale for applying advanced causal inference methods instead of relying on the traditional multivariable regression approach, which relies on stronger assumptions in a way that is often underappreciated by researchers.                                                                                                           |
|                        |    | (b) Describe any methods used to examine subgroups and interactions                                                          | The study conserved sample size/power for main effect estimation; effect modification was out of scope and of limited potentially utility, due to incomplete reporting of variables such as sample type (wedge vs. needle).                                                                                                                                                            |
|                        |    | (c) Explain how missing data were addressed                                                                                  | Conditional imputation using MICE is explained in Methods and shown in the statistical process flow (Figure S-2). If statistical inference were to be based on imputation methods, we would have used multiple imputation. However, since we used the bootstrap procedure to characterize statistical uncertainty in the entire analytical process, we used single imputation instead. |
|                        |    | (d) Cohort study—If applicable, explain how loss to follow-up was addressed                                                  | We found median follow-up times among non-failed transplants to exceed 8 years, and the reverse Kaplan-Meier estimates of median censoring time (the                                                                                                                                                                                                                                   |

*Case-control study*—If applicable, explain how matching of cases and controls was addressed

*Cross-sectional study*—If applicable, describe analytical methods taking account of sampling strategy

analytically preferred approach for quantifying length of follow-up) to exceed 9 years, suggesting minimal loss-to-follow-up in our study, with respect to our aim of estimating survival up to 10 years post-transplant.

(e) Describe any sensitivity analyses

The main sensitivity analysis conducted and reported in the paper involves using Empirical Bayes (“shrinkage”) estimation for more stable estimates of the % glomerulosclerosis. Results were similar to the primary analysis and are explained extensively in the paper and supplement.

Also, our use of the E-value, a relatively new measure, provides a type of sensitivity analysis to help assess how much of a concern unmeasured confounding may or may not be in this particular study. Results suggest that

---

## Results

Participants

13\*

(a) Report numbers of individuals at each stage of study—eg numbers potentially eligible, examined for eligibility, confirmed eligible, included in the study, completing follow-up, and analyzed

See CONSORT diagram (Figure 1).

(c) Use of a flow diagram

CONSORT diagram (Figure 1) and statistical method process flow (Figure S-2).

Descriptive data

14\*

(a) Give characteristics of study participants (eg demographic, clinical, social) and information on exposures and potential confounders

Tables S-1, S-2, and S-3 include summary statistics of both exposures and confounders, and show the degree to which they are associated.

|                   |     |                                                                                                                                                                                                              |                                                                                                                                                                                                                                                             |
|-------------------|-----|--------------------------------------------------------------------------------------------------------------------------------------------------------------------------------------------------------------|-------------------------------------------------------------------------------------------------------------------------------------------------------------------------------------------------------------------------------------------------------------|
|                   |     | (b) Indicate number of participants with missing data for each variable of interest                                                                                                                          | Included in Tables S-1, S-2, and S-3.                                                                                                                                                                                                                       |
|                   |     | (c) <i>Cohort study</i> —Summarise follow-up time (eg, average and total amount)                                                                                                                             | Included in Table 1.                                                                                                                                                                                                                                        |
| Outcome data      | 15* | <i>Cohort study</i> —Report numbers of outcome events or summary measures over time                                                                                                                          | Included in Table 1.                                                                                                                                                                                                                                        |
|                   |     | <i>Case-control study</i> —Report numbers in each exposure category, or summary measures of exposure                                                                                                         | <i>n/a</i>                                                                                                                                                                                                                                                  |
|                   |     | <i>Cross-sectional study</i> —Report numbers of outcome events or summary measures                                                                                                                           | <i>n/a</i>                                                                                                                                                                                                                                                  |
| Main results      | 16  | (a) Give unadjusted estimates and, if applicable, confounder-adjusted estimates and their precision (eg, 95% confidence interval). Make clear which confounders were adjusted for and why they were included | Both unadjusted and adjusted (using 3 different methods) are provided for comparison, along with confidence intervals. Variables included for adjustment, as well as uncorrelated variables evaluated but ultimately not included, are described in detail. |
| Other analyses    | 17  | Report other analyses done—eg analyses of subgroups and interactions, and sensitivity analyses                                                                                                               | Sensitivity analysis extensively described. Subgroup analysis and interaction effects were considered, and may be included in future work, but were out of scope at present.                                                                                |
| <b>Discussion</b> |     |                                                                                                                                                                                                              |                                                                                                                                                                                                                                                             |
| Key results       | 18  | Summarise key results with reference to study objectives                                                                                                                                                     | Description of results aligns with stated objective of estimating independent effects of the three biopsy exposure variables.                                                                                                                               |

|                  |    |                                                                                                                                                                            |                                                                                                                                                                                                                                                                                                                                                                                                                                                                         |
|------------------|----|----------------------------------------------------------------------------------------------------------------------------------------------------------------------------|-------------------------------------------------------------------------------------------------------------------------------------------------------------------------------------------------------------------------------------------------------------------------------------------------------------------------------------------------------------------------------------------------------------------------------------------------------------------------|
| Limitations      | 19 | Discuss limitations of the study, taking into account sources of potential bias or imprecision. Discuss both direction and magnitude of any potential bias                 | Limitations, including sample sizes, different types of bias, and unmeasured confounding, are discussed extensively. Our use of the E-value, a relatively new measure, aids in assessing the likelihood of unmeasured confounding materially affecting the study's key findings.                                                                                                                                                                                        |
| Interpretation   | 20 | Give a cautious overall interpretation of results considering objectives, limitations, multiplicity of analyses, results from similar studies, and other relevant evidence | Caution is weaved into the discussion and limitations, particularly surrounding potential findings related to vascular changes that are hampered by small sample sizes at the most extreme level.                                                                                                                                                                                                                                                                       |
| Generalisability | 21 | Discuss the generalisability (external validity) of the study results                                                                                                      | Results are clearly framed as being generalizable only to transplants using kidneys from older, marginal donors. These are the kidneys that tend to be routinely biopsied and for which debate continues on whether, and how, biopsy results could possibly help improve utilization decisions, not harm them. Further research would be needed to assess generalizability to higher quality kidneys, which are biopsied sporadically and often "for-cause" in the U.S. |

\*Give information separately for cases and controls in case-control studies and, if applicable, for exposed and unexposed groups in cohort and cross-sectional studies.

**Note:** An Explanation and Elaboration article discusses each checklist item and gives methodological background and published examples of transparent reporting. The STROBE checklist is best used in conjunction with this article (freely available on the Web sites of PLoS Medicine at <http://www.plosmedicine.org/>, Annals of Internal Medicine at <http://www.annals.org/>, and Epidemiology at <http://www.epidem.com/>). Information on the STROBE Initiative is available at [www.strobe-statement.org](http://www.strobe-statement.org).
